# Supplementary material for: Investigating Heritage Language Processing: Meaning Composition in Chinese Classifier-Noun Phrasal Contexts
Source: Front Psychol. 2021 Dec 17;12:782016. doi: 10.3389/fpsyg.2021.782016 (PMC8718634; doi:10.3389/fpsyg.2021.782016)
Supplement: Supplementary file 1 [file Data_Sheet_1.XLSX]

## Sheet: behavioralData
Group	Subject	constraint	CR	Condition	SubjectSelected
1	mono1	strong	f	strongf	1
1	mono1	weak	f	weakf	1
1	mono1	strong	f	strongf	1
1	mono1	strong	f	strongf	1
1	mono1	strong	f	strongf	1
1	mono1	weak	f	weakf	1
1	mono1	weak	f	weakf	1
1	mono1	strong	f	strongf	1
1	mono1	strong	f	strongf	1
1	mono1	weak	f	weakf	1
1	mono1	weak	f	weakf	1
1	mono1	strong	f	strongf	1
1	mono1	weak	f	weakf	1
1	mono1	strong	f	strongf	1
1	mono1	weak	f	weakf	1
1	mono1	strong	f	strongf	1
1	mono1	weak	f	weakf	1
1	mono1	strong	f	strongf	1
1	mono1	strong	f	strongf	1
1	mono1	weak	f	weakf	1
1	mono1	strong	f	strongf	1
1	mono1	weak	f	weakf	1
1	mono1	weak	f	weakf	1
1	mono1	strong	f	strongf	1
1	mono1	weak	f	weakf	1
1	mono1	strong	f	strongf	1
1	mono1	weak	f	weakf	1
1	mono1	strong	f	strongf	1
1	mono1	strong	f	strongf	1
1	mono1	weak	f	weakf	1
1	mono1	strong	f	strongf	1
1	mono1	weak	f	weakf	1
1	mono1	strong	f	strongf	1
1	mono1	weak	f	weakf	1
1	mono1	strong	f	strongf	1
1	mono1	weak	f	weakf	1
1	mono1	strong	f	strongf	1
1	mono1	weak	f	weakf	1
1	mono1	weak	f	weakf	1
1	mono1	strong	f	strongf	1
1	mono1	strong	f	strongf	1
1	mono1	weak	f	weakf	1
1	mono1	weak	r	weakr	1
1	mono1	weak	f	weakf	1
1	mono1	strong	f	strongf	1
1	mono1	strong	f	strongf	1
1	mono1	weak	f	weakf	1
1	mono1	weak	f	weakf	1
1	mono1	strong	f	strongf	1
1	mono1	weak	f	weakf	1
1	mono1	strong	f	strongf	1
1	mono1	weak	f	weakf	1
1	mono1	strong	f	strongf	1
1	mono1	weak	f	weakf	1
1	mono1	strong	f	strongf	1
1	mono1	weak	f	weakf	1
1	mono1	strong	f	strongf	1
1	mono1	weak	f	weakf	1
1	mono1	strong	f	strongf	1
1	mono1	weak	f	weakf	1
1	mono1	strong	f	strongf	1
1	mono1	strong	f	strongf	1
1	mono1	weak	f	weakf	1
1	mono1	weak	f	weakf	1
1	mono1	strong	f	strongf	1
1	mono1	weak	f	weakf	1
1	mono1	strong	f	strongf	1
1	mono1	strong	f	strongf	1
1	mono1	weak	f	weakf	1
1	mono1	weak	f	weakf	1
1	mono1	strong	f	strongf	1
1	mono2	weak	f	weakf	1
1	mono2	strong	f	strongf	1
1	mono2	strong	f	strongf	1
1	mono2	strong	f	strongf	1
1	mono2	weak	f	weakf	1
1	mono2	strong	f	strongf	1
1	mono2	weak	f	weakf	1
1	mono2	strong	f	strongf	1
1	mono2	weak	f	weakf	1
1	mono2	strong	f	strongf	1
1	mono2	strong	f	strongf	1
1	mono2	strong	f	strongf	1
1	mono2	weak	f	weakf	1
1	mono2	strong	f	strongf	1
1	mono2	weak	f	weakf	1
1	mono2	weak	f	weakf	1
1	mono2	strong	f	strongf	1
1	mono2	weak	f	weakf	1
1	mono2	strong	f	strongf	1
1	mono2	strong	f	strongf	1
1	mono2	strong	f	strongf	1
1	mono2	weak	f	weakf	1
1	mono2	weak	f	weakf	1
1	mono2	strong	f	strongf	1
1	mono2	weak	f	weakf	1
1	mono2	strong	f	strongf	1
1	mono2	weak	f	weakf	1
1	mono2	strong	f	strongf	1
1	mono2	weak	f	weakf	1
1	mono2	strong	f	strongf	1
1	mono2	strong	f	strongf	1
1	mono2	strong	f	strongf	1
1	mono2	weak	f	weakf	1
1	mono2	strong	f	strongf	1
1	mono2	weak	f	weakf	1
1	mono2	weak	f	weakf	1
1	mono2	strong	f	strongf	1
1	mono2	strong	f	strongf	1
1	mono2	weak	f	weakf	1
1	mono2	weak	f	weakf	1
1	mono2	strong	f	strongf	1
1	mono2	weak	f	weakf	1
1	mono2	strong	f	strongf	1
1	mono2	weak	f	weakf	1
1	mono2	strong	f	strongf	1
1	mono2	strong	f	strongf	1
1	mono2	weak	f	weakf	1
1	mono2	strong	f	strongf	1
1	mono2	weak	f	weakf	1
1	mono2	strong	f	strongf	1
1	mono2	weak	f	weakf	1
1	mono2	strong	f	strongf	1
1	mono2	weak	f	weakf	1
1	mono2	strong	f	strongf	1
1	mono2	weak	f	weakf	1
1	mono2	weak	f	weakf	1
1	mono2	strong	f	strongf	1
1	mono2	strong	f	strongf	1
1	mono2	weak	f	weakf	1
1	mono2	strong	f	strongf	1
1	mono2	weak	f	weakf	1
1	mono2	weak	r	weakr	1
1	mono2	weak	f	weakf	1
1	mono2	strong	f	strongf	1
1	mono2	weak	f	weakf	1
1	mono2	strong	f	strongf	1
1	mono2	strong	r	strongr	1
1	mono3	weak	f	weakf	1
1	mono3	strong	f	strongf	1
1	mono3	weak	f	weakf	1
1	mono3	strong	f	strongf	1
1	mono3	strong	f	strongf	1
1	mono3	strong	f	strongf	1
1	mono3	weak	f	weakf	1
1	mono3	weak	f	weakf	1
1	mono3	strong	f	strongf	1
1	mono3	strong	f	strongf	1
1	mono3	strong	f	strongf	1
1	mono3	weak	f	weakf	1
1	mono3	weak	f	weakf	1
1	mono3	strong	f	strongf	1
1	mono3	strong	f	strongf	1
1	mono3	weak	f	weakf	1
1	mono3	strong	f	strongf	1
1	mono3	weak	f	weakf	1
1	mono3	weak	f	weakf	1
1	mono3	strong	f	strongf	1
1	mono3	strong	f	strongf	1
1	mono3	strong	f	strongf	1
1	mono3	weak	f	weakf	1
1	mono3	weak	f	weakf	1
1	mono3	strong	f	strongf	1
1	mono3	weak	f	weakf	1
1	mono3	strong	f	strongf	1
1	mono3	strong	f	strongf	1
1	mono3	strong	f	strongf	1
1	mono3	weak	f	weakf	1
1	mono3	weak	f	weakf	1
1	mono3	strong	f	strongf	1
1	mono3	weak	f	weakf	1
1	mono3	weak	f	weakf	1
1	mono3	strong	f	strongf	1
1	mono3	weak	f	weakf	1
1	mono3	strong	f	strongf	1
1	mono3	weak	f	weakf	1
1	mono3	strong	f	strongf	1
1	mono3	weak	f	weakf	1
1	mono3	strong	f	strongf	1
1	mono3	weak	f	weakf	1
1	mono3	strong	f	strongf	1
1	mono3	weak	f	weakf	1
1	mono3	strong	f	strongf	1
1	mono3	strong	f	strongf	1
1	mono3	weak	f	weakf	1
1	mono3	weak	f	weakf	1
1	mono3	strong	f	strongf	1
1	mono3	weak	f	weakf	1
1	mono3	strong	f	strongf	1
1	mono3	strong	f	strongf	1
1	mono3	weak	f	weakf	1
1	mono3	weak	f	weakf	1
1	mono3	strong	f	strongf	1
1	mono3	weak	f	weakf	1
1	mono3	strong	f	strongf	1
1	mono3	weak	f	weakf	1
1	mono3	strong	f	strongf	1
1	mono3	strong	f	strongf	1
1	mono3	strong	f	strongf	1
1	mono3	weak	f	weakf	1
1	mono3	strong	f	strongf	1
1	mono3	weak	f	weakf	1
1	mono3	weak	f	weakf	1
1	mono3	strong	f	strongf	1
1	mono4	strong	f	strongf	1
1	mono4	weak	f	weakf	1
1	mono4	strong	f	strongf	1
1	mono4	weak	f	weakf	1
1	mono4	weak	f	weakf	1
1	mono4	strong	f	strongf	1
1	mono4	weak	f	weakf	1
1	mono4	strong	f	strongf	1
1	mono4	strong	f	strongf	1
1	mono4	weak	f	weakf	1
1	mono4	weak	f	weakf	1
1	mono4	strong	f	strongf	1
1	mono4	strong	f	strongf	1
1	mono4	strong	f	strongf	1
1	mono4	weak	f	weakf	1
1	mono4	strong	f	strongf	1
1	mono4	weak	f	weakf	1
1	mono4	strong	f	strongf	1
1	mono4	weak	f	weakf	1
1	mono4	weak	f	weakf	1
1	mono4	strong	f	strongf	1
1	mono4	strong	f	strongf	1
1	mono4	weak	f	weakf	1
1	mono4	strong	f	strongf	1
1	mono4	weak	f	weakf	1
1	mono4	strong	f	strongf	1
1	mono4	weak	f	weakf	1
1	mono4	strong	f	strongf	1
1	mono4	weak	f	weakf	1
1	mono4	weak	f	weakf	1
1	mono4	strong	f	strongf	1
1	mono4	strong	f	strongf	1
1	mono4	weak	f	weakf	1
1	mono4	strong	f	strongf	1
1	mono4	weak	f	weakf	1
1	mono4	strong	f	strongf	1
1	mono4	weak	f	weakf	1
1	mono4	strong	f	strongf	1
1	mono4	weak	f	weakf	1
1	mono4	weak	f	weakf	1
1	mono4	strong	f	strongf	1
1	mono4	strong	f	strongf	1
1	mono4	weak	f	weakf	1
1	mono4	strong	f	strongf	1
1	mono4	weak	f	weakf	1
1	mono4	weak	f	weakf	1
1	mono4	strong	f	strongf	1
1	mono4	strong	f	strongf	1
1	mono4	weak	f	weakf	1
1	mono4	strong	f	strongf	1
1	mono4	weak	f	weakf	1
1	mono4	strong	f	strongf	1
1	mono4	weak	r	weakr	1
1	mono4	strong	f	strongf	1
1	mono4	weak	f	weakf	1
1	mono4	strong	f	strongf	1
1	mono4	weak	f	weakf	1
1	mono4	weak	f	weakf	1
1	mono4	strong	f	strongf	1
1	mono4	strong	f	strongf	1
1	mono4	weak	f	weakf	1
1	mono4	weak	f	weakf	1
1	mono4	strong	f	strongf	1
1	mono4	strong	f	strongf	1
1	mono4	weak	f	weakf	1
1	mono4	strong	f	strongf	1
1	mono4	weak	f	weakf	1
1	mono4	strong	f	strongf	1
1	mono4	weak	f	weakf	1
1	mono4	weak	f	weakf	1
1	mono4	strong	f	strongf	1
1	mono5	weak	f	weakf	1
1	mono5	strong	f	strongf	1
1	mono5	weak	f	weakf	1
1	mono5	strong	f	strongf	1
1	mono5	strong	f	strongf	1
1	mono5	weak	f	weakf	1
1	mono5	strong	f	strongf	1
1	mono5	weak	f	weakf	1
1	mono5	weak	f	weakf	1
1	mono5	strong	f	strongf	1
1	mono5	strong	f	strongf	1
1	mono5	weak	f	weakf	1
1	mono5	weak	f	weakf	1
1	mono5	strong	f	strongf	1
1	mono5	weak	f	weakf	1
1	mono5	strong	f	strongf	1
1	mono5	weak	f	weakf	1
1	mono5	strong	f	strongf	1
1	mono5	weak	f	weakf	1
1	mono5	strong	f	strongf	1
1	mono5	strong	f	strongf	1
1	mono5	weak	r	weakr	1
1	mono5	weak	f	weakf	1
1	mono5	strong	f	strongf	1
1	mono5	strong	f	strongf	1
1	mono5	weak	f	weakf	1
1	mono5	weak	f	weakf	1
1	mono5	strong	f	strongf	1
1	mono5	weak	f	weakf	1
1	mono5	strong	f	strongf	1
1	mono5	weak	f	weakf	1
1	mono5	weak	f	weakf	1
1	mono5	strong	f	strongf	1
1	mono5	weak	f	weakf	1
1	mono5	strong	f	strongf	1
1	mono5	weak	f	weakf	1
1	mono5	weak	f	weakf	1
1	mono5	strong	f	strongf	1
1	mono5	weak	f	weakf	1
1	mono5	strong	f	strongf	1
1	mono5	strong	f	strongf	1
1	mono5	weak	f	weakf	1
1	mono5	strong	f	strongf	1
1	mono5	strong	f	strongf	1
1	mono5	weak	f	weakf	1
1	mono5	strong	f	strongf	1
1	mono5	weak	f	weakf	1
1	mono5	strong	f	strongf	1
1	mono5	weak	f	weakf	1
1	mono5	strong	f	strongf	1
1	mono5	strong	f	strongf	1
1	mono5	weak	f	weakf	1
1	mono5	strong	f	strongf	1
1	mono5	weak	f	weakf	1
1	mono5	strong	f	strongf	1
1	mono5	weak	f	weakf	1
1	mono5	strong	f	strongf	1
1	mono5	weak	f	weakf	1
1	mono6	weak	f	weakf	1
1	mono6	strong	f	strongf	1
1	mono6	weak	f	weakf	1
1	mono6	strong	f	strongf	1
1	mono6	weak	f	weakf	1
1	mono6	strong	f	strongf	1
1	mono6	weak	f	weakf	1
1	mono6	strong	f	strongf	1
1	mono6	strong	f	strongf	1
1	mono6	weak	f	weakf	1
1	mono6	strong	f	strongf	1
1	mono6	weak	f	weakf	1
1	mono6	weak	f	weakf	1
1	mono6	strong	f	strongf	1
1	mono6	weak	f	weakf	1
1	mono6	strong	f	strongf	1
1	mono6	strong	f	strongf	1
1	mono6	weak	f	weakf	1
1	mono6	strong	f	strongf	1
1	mono6	weak	r	weakr	1
1	mono6	weak	f	weakf	1
1	mono6	strong	f	strongf	1
1	mono6	weak	f	weakf	1
1	mono6	weak	f	weakf	1
1	mono6	strong	f	strongf	1
1	mono6	strong	f	strongf	1
1	mono6	weak	f	weakf	1
1	mono6	strong	f	strongf	1
1	mono6	weak	f	weakf	1
1	mono6	weak	r	weakr	1
1	mono6	weak	f	weakf	1
1	mono6	strong	f	strongf	1
1	mono6	strong	f	strongf	1
1	mono6	weak	f	weakf	1
1	mono6	strong	f	strongf	1
1	mono6	weak	f	weakf	1
1	mono6	strong	f	strongf	1
1	mono6	weak	f	weakf	1
1	mono6	weak	f	weakf	1
1	mono6	strong	f	strongf	1
1	mono6	strong	f	strongf	1
1	mono6	weak	f	weakf	1
1	mono6	strong	f	strongf	1
1	mono6	weak	f	weakf	1
1	mono6	weak	f	weakf	1
1	mono6	strong	f	strongf	1
1	mono6	strong	f	strongf	1
1	mono6	weak	f	weakf	1
1	mono6	strong	f	strongf	1
1	mono6	weak	f	weakf	1
1	mono6	strong	f	strongf	1
1	mono6	weak	f	weakf	1
1	mono6	strong	f	strongf	1
1	mono6	weak	f	weakf	1
1	mono6	strong	f	strongf	1
1	mono6	weak	f	weakf	1
1	mono6	weak	f	weakf	1
1	mono6	strong	f	strongf	1
1	mono6	strong	f	strongf	1
1	mono6	weak	f	weakf	1
1	mono6	strong	f	strongf	1
1	mono6	weak	f	weakf	1
1	mono6	strong	f	strongf	1
1	mono6	weak	f	weakf	1
1	mono6	weak	r	weakr	1
1	mono6	strong	f	strongf	1
1	mono6	weak	f	weakf	1
1	mono6	weak	f	weakf	1
1	mono6	strong	f	strongf	1
1	mono6	strong	f	strongf	1
1	mono6	weak	f	weakf	1
1	mono6	weak	f	weakf	1
1	mono6	strong	f	strongf	1
1	mono6	weak	f	weakf	1
1	mono6	strong	f	strongf	1
1	mono7	strong	f	strongf	1
1	mono7	strong	f	strongf	1
1	mono7	weak	f	weakf	1
1	mono7	strong	f	strongf	1
1	mono7	weak	f	weakf	1
1	mono7	strong	f	strongf	1
1	mono7	weak	f	weakf	1
1	mono7	strong	f	strongf	1
1	mono7	strong	f	strongf	1
1	mono7	weak	f	weakf	1
1	mono7	weak	f	weakf	1
1	mono7	strong	f	strongf	1
1	mono7	weak	f	weakf	1
1	mono7	strong	f	strongf	1
1	mono7	weak	f	weakf	1
1	mono7	weak	f	weakf	1
1	mono7	strong	f	strongf	1
1	mono7	weak	f	weakf	1
1	mono7	weak	f	weakf	1
1	mono7	strong	f	strongf	1
1	mono7	weak	f	weakf	1
1	mono7	strong	f	strongf	1
1	mono7	weak	f	weakf	1
1	mono7	strong	f	strongf	1
1	mono7	weak	r	weakr	1
1	mono7	weak	f	weakf	1
1	mono7	weak	f	weakf	1
1	mono7	strong	f	strongf	1
1	mono7	weak	f	weakf	1
1	mono7	strong	f	strongf	1
1	mono7	strong	f	strongf	1
1	mono7	strong	f	strongf	1
1	mono7	weak	f	weakf	1
1	mono7	strong	f	strongf	1
1	mono7	weak	f	weakf	1
1	mono7	strong	f	strongf	1
1	mono7	weak	f	weakf	1
1	mono7	weak	f	weakf	1
1	mono7	strong	f	strongf	1
1	mono7	strong	f	strongf	1
1	mono7	strong	f	strongf	1
1	mono7	weak	f	weakf	1
1	mono7	strong	f	strongf	1
1	mono7	weak	f	weakf	1
1	mono7	strong	f	strongf	1
1	mono7	weak	f	weakf	1
1	mono7	weak	f	weakf	1
1	mono7	strong	f	strongf	1
1	mono7	strong	f	strongf	1
1	mono7	weak	f	weakf	1
1	mono7	weak	f	weakf	1
1	mono7	strong	f	strongf	1
1	mono7	strong	f	strongf	1
1	mono7	weak	f	weakf	1
1	mono7	weak	f	weakf	1
1	mono7	strong	f	strongf	1
1	mono7	strong	f	strongf	1
1	mono7	weak	f	weakf	1
1	mono7	strong	f	strongf	1
1	mono7	weak	f	weakf	1
1	mono7	weak	f	weakf	1
1	mono7	strong	f	strongf	1
1	mono8	strong	f	strongf	1
1	mono8	weak	f	weakf	1
1	mono8	strong	f	strongf	1
1	mono8	weak	f	weakf	1
1	mono8	strong	f	strongf	1
1	mono8	strong	f	strongf	1
1	mono8	weak	f	weakf	1
1	mono8	weak	f	weakf	1
1	mono8	strong	f	strongf	1
1	mono8	weak	f	weakf	1
1	mono8	strong	f	strongf	1
1	mono8	strong	f	strongf	1
1	mono8	weak	f	weakf	1
1	mono8	strong	f	strongf	1
1	mono8	weak	f	weakf	1
1	mono8	strong	f	strongf	1
1	mono8	weak	f	weakf	1
1	mono8	strong	f	strongf	1
1	mono8	weak	f	weakf	1
1	mono8	weak	f	weakf	1
1	mono8	strong	f	strongf	1
1	mono8	weak	f	weakf	1
1	mono8	weak	f	weakf	1
1	mono8	strong	f	strongf	1
1	mono8	weak	f	weakf	1
1	mono8	strong	f	strongf	1
1	mono8	weak	f	weakf	1
1	mono8	strong	f	strongf	1
1	mono8	weak	r	weakr	1
1	mono8	weak	f	weakf	1
1	mono8	strong	f	strongf	1
1	mono8	weak	f	weakf	1
1	mono8	weak	f	weakf	1
1	mono8	strong	f	strongf	1
1	mono8	weak	f	weakf	1
1	mono8	strong	f	strongf	1
1	mono8	weak	r	weakr	1
1	mono8	weak	f	weakf	1
1	mono8	strong	f	strongf	1
1	mono8	strong	f	strongf	1
1	mono8	weak	f	weakf	1
1	mono8	strong	f	strongf	1
1	mono8	weak	f	weakf	1
1	mono8	strong	f	strongf	1
1	mono8	strong	f	strongf	1
1	mono8	weak	f	weakf	1
1	mono8	strong	f	strongf	1
1	mono8	weak	f	weakf	1
1	mono8	weak	f	weakf	1
1	mono8	strong	f	strongf	1
1	mono8	strong	f	strongf	1
1	mono8	strong	f	strongf	1
1	mono8	weak	f	weakf	1
1	mono8	strong	f	strongf	1
1	mono8	weak	f	weakf	1
1	mono8	weak	f	weakf	1
1	mono8	strong	f	strongf	1
1	mono8	strong	f	strongf	1
1	mono8	weak	f	weakf	1
1	mono8	weak	f	weakf	1
1	mono8	strong	f	strongf	1
1	mono8	strong	r	strongr	1
1	mono8	weak	f	weakf	1
1	mono8	strong	f	strongf	1
1	mono8	weak	f	weakf	1
1	mono8	strong	f	strongf	1
1	mono8	strong	f	strongf	1
1	mono8	weak	f	weakf	1
1	mono8	weak	f	weakf	1
1	mono8	strong	f	strongf	1
1	mono9	weak	f	weakf	1
1	mono9	strong	f	strongf	1
1	mono9	strong	f	strongf	1
1	mono9	weak	f	weakf	1
1	mono9	weak	f	weakf	1
1	mono9	strong	f	strongf	1
1	mono9	weak	f	weakf	1
1	mono9	strong	f	strongf	1
1	mono9	weak	f	weakf	1
1	mono9	strong	f	strongf	1
1	mono9	weak	f	weakf	1
1	mono9	strong	f	strongf	1
1	mono9	weak	f	weakf	1
1	mono9	strong	f	strongf	1
1	mono9	strong	f	strongf	1
1	mono9	weak	f	weakf	1
1	mono9	strong	f	strongf	1
1	mono9	weak	f	weakf	1
1	mono9	weak	r	weakr	1
1	mono9	weak	f	weakf	1
1	mono9	strong	f	strongf	1
1	mono9	strong	f	strongf	1
1	mono9	weak	f	weakf	1
1	mono9	weak	f	weakf	1
1	mono9	strong	f	strongf	1
1	mono9	strong	f	strongf	1
1	mono9	weak	f	weakf	1
1	mono9	strong	f	strongf	1
1	mono9	weak	f	weakf	1
1	mono9	strong	f	strongf	1
1	mono9	weak	f	weakf	1
1	mono9	weak	f	weakf	1
1	mono9	strong	f	strongf	1
1	mono9	weak	f	weakf	1
1	mono9	strong	f	strongf	1
1	mono9	strong	f	strongf	1
1	mono9	weak	f	weakf	1
1	mono9	weak	f	weakf	1
1	mono9	strong	f	strongf	1
1	mono9	strong	f	strongf	1
1	mono9	weak	f	weakf	1
1	mono9	strong	f	strongf	1
1	mono9	weak	f	weakf	1
1	mono9	weak	f	weakf	1
1	mono9	strong	f	strongf	1
1	mono9	weak	f	weakf	1
1	mono9	strong	f	strongf	1
1	mono9	weak	f	weakf	1
1	mono9	strong	f	strongf	1
1	mono9	weak	f	weakf	1
1	mono9	strong	f	strongf	1
1	mono9	strong	f	strongf	1
1	mono9	weak	f	weakf	1
1	mono9	weak	f	weakf	1
1	mono9	strong	f	strongf	1
1	mono9	weak	f	weakf	1
1	mono9	strong	f	strongf	1
1	mono9	weak	f	weakf	1
1	mono9	strong	f	strongf	1
1	mono9	strong	f	strongf	1
1	mono9	weak	f	weakf	1
1	mono9	weak	f	weakf	1
1	mono9	strong	f	strongf	1
1	mono9	strong	f	strongf	1
1	mono9	weak	f	weakf	1
1	mono9	weak	f	weakf	1
1	mono9	strong	f	strongf	1
1	mono9	strong	f	strongf	1
1	mono9	weak	f	weakf	1
1	mono9	strong	f	strongf	1
1	mono9	weak	f	weakf	1
1	mono9	strong	f	strongf	1
1	mono9	weak	f	weakf	1
1	mono10	weak	f	weakf	1
1	mono10	strong	f	strongf	1
1	mono10	weak	r	weakr	1
1	mono10	strong	f	strongf	1
1	mono10	weak	f	weakf	1
1	mono10	weak	f	weakf	1
1	mono10	strong	f	strongf	1
1	mono10	strong	f	strongf	1
1	mono10	weak	f	weakf	1
1	mono10	weak	f	weakf	1
1	mono10	strong	f	strongf	1
1	mono10	strong	f	strongf	1
1	mono10	weak	f	weakf	1
1	mono10	strong	f	strongf	1
1	mono10	weak	f	weakf	1
1	mono10	weak	f	weakf	1
1	mono10	strong	f	strongf	1
1	mono10	strong	f	strongf	1
1	mono10	weak	f	weakf	1
1	mono10	weak	f	weakf	1
1	mono10	strong	f	strongf	1
1	mono10	strong	f	strongf	1
1	mono10	weak	r	weakr	1
1	mono10	weak	f	weakf	1
1	mono10	strong	f	strongf	1
1	mono10	weak	f	weakf	1
1	mono10	strong	f	strongf	1
1	mono10	weak	f	weakf	1
1	mono10	strong	f	strongf	1
1	mono10	weak	f	weakf	1
1	mono10	weak	f	weakf	1
1	mono10	strong	f	strongf	1
1	mono10	weak	f	weakf	1
1	mono10	strong	f	strongf	1
1	mono10	strong	f	strongf	1
1	mono10	weak	f	weakf	1
1	mono10	weak	f	weakf	1
1	mono10	strong	f	strongf	1
1	mono10	strong	f	strongf	1
1	mono10	weak	f	weakf	1
1	mono10	weak	f	weakf	1
1	mono10	strong	f	strongf	1
1	mono10	weak	f	weakf	1
1	mono10	strong	f	strongf	1
1	mono10	strong	f	strongf	1
1	mono10	weak	f	weakf	1
1	mono10	weak	f	weakf	1
1	mono10	strong	f	strongf	1
1	mono10	weak	f	weakf	1
1	mono10	strong	f	strongf	1
1	mono10	strong	f	strongf	1
1	mono10	weak	f	weakf	1
1	mono10	weak	f	weakf	1
1	mono10	strong	f	strongf	1
1	mono10	strong	f	strongf	1
1	mono10	strong	r	strongr	1
1	mono10	weak	f	weakf	1
1	mono10	strong	f	strongf	1
1	mono10	weak	f	weakf	1
1	mono10	strong	f	strongf	1
1	mono10	weak	f	weakf	1
1	mono10	weak	f	weakf	1
1	mono10	strong	f	strongf	1
1	mono10	weak	f	weakf	1
1	mono10	strong	f	strongf	1
1	mono10	strong	f	strongf	1
1	mono10	weak	f	weakf	1
1	mono10	strong	f	strongf	1
1	mono10	weak	f	weakf	1
1	mono10	strong	f	strongf	1
1	mono10	weak	f	weakf	1
1	mono10	strong	f	strongf	1
1	mono10	weak	f	weakf	1
1	mono10	strong	f	strongf	1
1	mono10	weak	f	weakf	1
1	mono11	weak	f	weakf	1
1	mono11	strong	f	strongf	1
1	mono11	weak	f	weakf	1
1	mono11	strong	f	strongf	1
1	mono11	strong	f	strongf	1
1	mono11	weak	f	weakf	1
1	mono11	strong	f	strongf	1
1	mono11	weak	f	weakf	1
1	mono11	weak	f	weakf	1
1	mono11	strong	f	strongf	1
1	mono11	weak	f	weakf	1
1	mono11	strong	f	strongf	1
1	mono11	weak	f	weakf	1
1	mono11	strong	f	strongf	1
1	mono11	weak	f	weakf	1
1	mono11	strong	f	strongf	1
1	mono11	strong	f	strongf	1
1	mono11	weak	f	weakf	1
1	mono11	strong	f	strongf	1
1	mono11	weak	f	weakf	1
1	mono11	weak	f	weakf	1
1	mono11	strong	f	strongf	1
1	mono11	weak	f	weakf	1
1	mono11	strong	f	strongf	1
1	mono11	weak	f	weakf	1
1	mono11	strong	f	strongf	1
1	mono11	strong	f	strongf	1
1	mono11	weak	f	weakf	1
1	mono11	weak	f	weakf	1
1	mono11	strong	f	strongf	1
1	mono11	weak	f	weakf	1
1	mono11	strong	f	strongf	1
1	mono11	strong	f	strongf	1
1	mono11	weak	f	weakf	1
1	mono11	strong	f	strongf	1
1	mono11	strong	f	strongf	1
1	mono11	weak	f	weakf	1
1	mono11	weak	f	weakf	1
1	mono11	strong	f	strongf	1
1	mono11	strong	f	strongf	1
1	mono11	weak	f	weakf	1
1	mono11	weak	f	weakf	1
1	mono11	strong	f	strongf	1
1	mono11	strong	f	strongf	1
1	mono11	weak	f	weakf	1
1	mono11	weak	f	weakf	1
1	mono11	strong	f	strongf	1
1	mono11	weak	f	weakf	1
1	mono11	strong	f	strongf	1
1	mono11	weak	f	weakf	1
1	mono11	strong	f	strongf	1
1	mono11	weak	f	weakf	1
1	mono11	strong	f	strongf	1
1	mono11	weak	f	weakf	1
1	mono11	strong	f	strongf	1
1	mono11	strong	f	strongf	1
1	mono11	strong	f	strongf	1
1	mono11	weak	f	weakf	1
1	mono11	strong	f	strongf	1
1	mono11	weak	f	weakf	1
1	mono11	weak	f	weakf	1
1	mono11	strong	f	strongf	1
1	mono11	weak	f	weakf	1
1	mono11	strong	f	strongf	1
1	mono11	weak	f	weakf	1
1	mono11	strong	f	strongf	1
1	mono11	strong	f	strongf	1
1	mono11	weak	f	weakf	1
1	mono11	weak	f	weakf	1
1	mono11	strong	f	strongf	1
1	mono12	weak	f	weakf	1
1	mono12	strong	f	strongf	1
1	mono12	strong	f	strongf	1
1	mono12	weak	f	weakf	1
1	mono12	weak	f	weakf	1
1	mono12	strong	f	strongf	1
1	mono12	strong	f	strongf	1
1	mono12	weak	f	weakf	1
1	mono12	strong	f	strongf	1
1	mono12	weak	f	weakf	1
1	mono12	strong	f	strongf	1
1	mono12	weak	f	weakf	1
1	mono12	weak	f	weakf	1
1	mono12	strong	f	strongf	1
1	mono12	strong	f	strongf	1
1	mono12	weak	f	weakf	1
1	mono12	weak	f	weakf	1
1	mono12	strong	f	strongf	1
1	mono12	weak	f	weakf	1
1	mono12	strong	f	strongf	1
1	mono12	weak	f	weakf	1
1	mono12	strong	f	strongf	1
1	mono12	weak	f	weakf	1
1	mono12	strong	f	strongf	1
1	mono12	strong	f	strongf	1
1	mono12	weak	f	weakf	1
1	mono12	weak	f	weakf	1
1	mono12	strong	f	strongf	1
1	mono12	strong	f	strongf	1
1	mono12	weak	f	weakf	1
1	mono12	weak	f	weakf	1
1	mono12	strong	f	strongf	1
1	mono12	weak	f	weakf	1
1	mono12	strong	f	strongf	1
1	mono12	strong	f	strongf	1
1	mono12	weak	f	weakf	1
1	mono12	weak	f	weakf	1
1	mono12	strong	f	strongf	1
1	mono12	weak	f	weakf	1
1	mono12	strong	f	strongf	1
1	mono12	strong	f	strongf	1
1	mono12	weak	f	weakf	1
1	mono12	strong	f	strongf	1
1	mono12	weak	f	weakf	1
1	mono12	strong	f	strongf	1
1	mono12	weak	f	weakf	1
1	mono12	weak	f	weakf	1
1	mono12	strong	f	strongf	1
1	mono12	weak	f	weakf	1
1	mono12	strong	f	strongf	1
1	mono12	strong	f	strongf	1
1	mono12	weak	f	weakf	1
1	mono12	weak	f	weakf	1
1	mono12	strong	f	strongf	1
1	mono12	strong	f	strongf	1
1	mono12	weak	f	weakf	1
1	mono12	strong	f	strongf	1
1	mono12	strong	f	strongf	1
1	mono12	weak	f	weakf	1
1	mono12	strong	f	strongf	1
1	mono12	weak	f	weakf	1
1	mono12	strong	f	strongf	1
1	mono12	weak	f	weakf	1
1	mono12	strong	f	strongf	1
1	mono12	weak	f	weakf	1
1	mono12	weak	f	weakf	1
1	mono12	strong	f	strongf	1
1	mono12	weak	f	weakf	1
1	mono12	strong	f	strongf	1
1	mono12	strong	f	strongf	1
1	mono12	weak	f	weakf	1
1	mono13	strong	f	strongf	1
1	mono13	weak	f	weakf	1
1	mono13	strong	f	strongf	1
1	mono13	weak	f	weakf	1
1	mono13	weak	r	weakr	1
1	mono13	strong	f	strongf	1
1	mono13	weak	f	weakf	1
1	mono13	strong	f	strongf	1
1	mono13	weak	f	weakf	1
1	mono13	weak	f	weakf	1
1	mono13	strong	f	strongf	1
1	mono13	weak	f	weakf	1
1	mono13	strong	f	strongf	1
1	mono13	strong	f	strongf	1
1	mono13	weak	f	weakf	1
1	mono13	weak	f	weakf	1
1	mono13	strong	f	strongf	1
1	mono13	strong	f	strongf	1
1	mono13	weak	r	weakr	1
1	mono13	weak	f	weakf	1
1	mono13	strong	f	strongf	1
1	mono13	strong	f	strongf	1
1	mono13	weak	f	weakf	1
1	mono13	strong	f	strongf	1
1	mono13	weak	f	weakf	1
1	mono13	weak	f	weakf	1
1	mono13	strong	f	strongf	1
1	mono13	weak	f	weakf	1
1	mono13	weak	f	weakf	1
1	mono13	strong	f	strongf	1
1	mono13	strong	f	strongf	1
1	mono13	strong	f	strongf	1
1	mono13	strong	f	strongf	1
1	mono13	weak	f	weakf	1
1	mono13	weak	f	weakf	1
1	mono13	strong	f	strongf	1
1	mono13	strong	f	strongf	1
1	mono13	weak	f	weakf	1
1	mono13	strong	f	strongf	1
1	mono13	weak	f	weakf	1
1	mono13	weak	f	weakf	1
1	mono13	strong	f	strongf	1
1	mono13	strong	f	strongf	1
1	mono13	strong	r	strongr	1
1	mono13	strong	f	strongf	1
1	mono13	weak	f	weakf	1
1	mono13	strong	f	strongf	1
1	mono13	weak	f	weakf	1
1	mono13	strong	f	strongf	1
1	mono13	weak	f	weakf	1
1	mono13	strong	f	strongf	1
1	mono13	weak	f	weakf	1
1	mono13	weak	f	weakf	1
1	mono13	weak	f	weakf	1
1	mono13	strong	f	strongf	1
1	mono13	weak	f	weakf	1
1	mono13	weak	f	weakf	1
1	mono13	strong	f	strongf	1
1	mono13	strong	f	strongf	1
1	mono13	weak	f	weakf	1
1	mono13	strong	f	strongf	1
1	mono13	weak	f	weakf	1
1	mono13	weak	f	weakf	1
1	mono13	strong	f	strongf	1
1	mono14	weak	f	weakf	1
1	mono14	strong	f	strongf	1
1	mono14	strong	f	strongf	1
1	mono14	weak	f	weakf	1
1	mono14	strong	f	strongf	1
1	mono14	weak	f	weakf	1
1	mono14	strong	f	strongf	1
1	mono14	weak	f	weakf	1
1	mono14	weak	f	weakf	1
1	mono14	strong	f	strongf	1
1	mono14	weak	f	weakf	1
1	mono14	strong	f	strongf	1
1	mono14	strong	f	strongf	1
1	mono14	weak	f	weakf	1
1	mono14	weak	f	weakf	1
1	mono14	strong	f	strongf	1
1	mono14	strong	f	strongf	1
1	mono14	weak	f	weakf	1
1	mono14	weak	f	weakf	1
1	mono14	strong	f	strongf	1
1	mono14	weak	f	weakf	1
1	mono14	strong	f	strongf	1
1	mono14	weak	f	weakf	1
1	mono14	strong	f	strongf	1
1	mono14	weak	f	weakf	1
1	mono14	strong	f	strongf	1
1	mono14	weak	f	weakf	1
1	mono14	strong	f	strongf	1
1	mono14	weak	f	weakf	1
1	mono14	strong	f	strongf	1
1	mono14	strong	f	strongf	1
1	mono14	weak	f	weakf	1
1	mono14	weak	f	weakf	1
1	mono14	strong	f	strongf	1
1	mono14	weak	f	weakf	1
1	mono14	strong	f	strongf	1
1	mono14	weak	f	weakf	1
1	mono14	strong	f	strongf	1
1	mono14	weak	f	weakf	1
1	mono14	strong	f	strongf	1
1	mono14	weak	f	weakf	1
1	mono14	strong	f	strongf	1
1	mono14	weak	f	weakf	1
1	mono14	strong	f	strongf	1
1	mono14	strong	f	strongf	1
1	mono14	weak	f	weakf	1
1	mono14	strong	f	strongf	1
1	mono14	weak	f	weakf	1
1	mono14	weak	f	weakf	1
1	mono14	strong	f	strongf	1
1	mono14	weak	f	weakf	1
1	mono14	strong	f	strongf	1
1	mono14	weak	f	weakf	1
1	mono14	strong	f	strongf	1
1	mono14	weak	f	weakf	1
1	mono14	weak	f	weakf	1
1	mono14	strong	f	strongf	1
1	mono14	strong	f	strongf	1
1	mono14	weak	f	weakf	1
1	mono14	weak	f	weakf	1
1	mono14	strong	f	strongf	1
1	mono14	strong	f	strongf	1
1	mono14	weak	f	weakf	1
1	mono14	weak	r	weakr	1
1	mono14	weak	f	weakf	1
1	mono14	strong	f	strongf	1
1	mono14	strong	f	strongf	1
1	mono14	weak	f	weakf	1
1	mono14	strong	f	strongf	1
1	mono14	weak	f	weakf	1
1	mono14	strong	f	strongf	1
1	mono15	weak	f	weakf	1
1	mono15	weak	f	weakf	1
1	mono15	weak	f	weakf	1
1	mono15	strong	f	strongf	1
1	mono15	weak	f	weakf	1
1	mono15	weak	f	weakf	1
1	mono15	strong	f	strongf	1
1	mono15	strong	f	strongf	1
1	mono15	weak	f	weakf	1
1	mono15	weak	f	weakf	1
1	mono15	strong	f	strongf	1
1	mono15	weak	f	weakf	1
1	mono15	strong	f	strongf	1
1	mono15	weak	f	weakf	1
1	mono15	strong	f	strongf	1
1	mono15	weak	f	weakf	1
1	mono15	strong	f	strongf	1
1	mono15	strong	f	strongf	1
1	mono15	strong	f	strongf	1
1	mono15	weak	f	weakf	1
1	mono15	weak	f	weakf	1
1	mono15	strong	f	strongf	1
1	mono15	strong	f	strongf	1
1	mono15	weak	f	weakf	1
1	mono15	weak	f	weakf	1
1	mono15	strong	f	strongf	1
1	mono15	strong	f	strongf	1
1	mono15	weak	f	weakf	1
1	mono15	weak	f	weakf	1
1	mono15	strong	f	strongf	1
1	mono15	weak	f	weakf	1
1	mono15	strong	f	strongf	1
1	mono15	weak	f	weakf	1
1	mono15	strong	f	strongf	1
1	mono15	strong	f	strongf	1
1	mono15	weak	f	weakf	1
1	mono15	strong	f	strongf	1
1	mono15	weak	f	weakf	1
1	mono15	strong	f	strongf	1
1	mono15	weak	f	weakf	1
1	mono15	strong	f	strongf	1
1	mono15	weak	f	weakf	1
1	mono15	strong	f	strongf	1
1	mono15	weak	f	weakf	1
1	mono15	weak	f	weakf	1
1	mono15	strong	f	strongf	1
1	mono15	strong	f	strongf	1
1	mono15	weak	f	weakf	1
1	mono15	weak	f	weakf	1
1	mono15	strong	f	strongf	1
1	mono15	strong	f	strongf	1
1	mono15	weak	f	weakf	1
1	mono15	strong	f	strongf	1
1	mono15	weak	f	weakf	1
1	mono15	weak	f	weakf	1
1	mono15	strong	f	strongf	1
1	mono15	strong	f	strongf	1
1	mono15	weak	f	weakf	1
1	mono15	strong	f	strongf	1
1	mono15	weak	f	weakf	1
1	mono15	strong	f	strongf	1
1	mono15	weak	f	weakf	1
1	mono15	strong	f	strongf	1
1	mono15	strong	f	strongf	1
1	mono15	weak	f	weakf	1
1	mono15	strong	f	strongf	1
1	mono16	strong	f	strongf	1
1	mono16	weak	f	weakf	1
1	mono16	strong	f	strongf	1
1	mono16	weak	f	weakf	1
1	mono16	strong	f	strongf	1
1	mono16	weak	f	weakf	1
1	mono16	weak	f	weakf	1
1	mono16	strong	f	strongf	1
1	mono16	strong	f	strongf	1
1	mono16	weak	f	weakf	1
1	mono16	weak	f	weakf	1
1	mono16	strong	f	strongf	1
1	mono16	weak	f	weakf	1
1	mono16	strong	f	strongf	1
1	mono16	weak	f	weakf	1
1	mono16	strong	f	strongf	1
1	mono16	weak	f	weakf	1
1	mono16	strong	f	strongf	1
1	mono16	strong	f	strongf	1
1	mono16	weak	f	weakf	1
1	mono16	weak	f	weakf	1
1	mono16	strong	f	strongf	1
1	mono16	strong	f	strongf	1
1	mono16	weak	f	weakf	1
1	mono16	strong	r	strongr	1
1	mono16	weak	f	weakf	1
1	mono16	strong	f	strongf	1
1	mono16	strong	f	strongf	1
1	mono16	weak	f	weakf	1
1	mono16	strong	f	strongf	1
1	mono16	weak	f	weakf	1
1	mono16	strong	f	strongf	1
1	mono16	weak	f	weakf	1
1	mono16	weak	f	weakf	1
1	mono16	strong	f	strongf	1
1	mono16	weak	f	weakf	1
1	mono16	strong	f	strongf	1
1	mono16	strong	f	strongf	1
1	mono16	weak	f	weakf	1
1	mono16	strong	f	strongf	1
1	mono16	weak	f	weakf	1
1	mono16	strong	f	strongf	1
1	mono16	weak	f	weakf	1
1	mono16	strong	f	strongf	1
1	mono16	weak	f	weakf	1
1	mono16	strong	f	strongf	1
1	mono16	weak	f	weakf	1
1	mono16	strong	f	strongf	1
1	mono16	weak	f	weakf	1
1	mono16	weak	f	weakf	1
1	mono16	strong	f	strongf	1
1	mono16	strong	f	strongf	1
1	mono16	weak	f	weakf	1
1	mono16	weak	f	weakf	1
1	mono16	strong	f	strongf	1
1	mono16	strong	f	strongf	1
1	mono16	weak	f	weakf	1
1	mono16	strong	f	strongf	1
1	mono16	weak	f	weakf	1
1	mono16	strong	f	strongf	1
1	mono16	weak	f	weakf	1
1	mono16	weak	f	weakf	1
1	mono16	strong	f	strongf	1
1	mono16	strong	f	strongf	1
1	mono16	weak	f	weakf	1
1	mono16	weak	f	weakf	1
1	mono16	strong	f	strongf	1
1	mono16	weak	f	weakf	1
1	mono16	strong	f	strongf	1
1	mono16	weak	f	weakf	1
1	mono16	strong	f	strongf	1
1	mono16	strong	f	strongf	1
1	mono16	weak	f	weakf	1
1	mono17	weak	f	weakf	1
1	mono17	strong	f	strongf	1
1	mono17	weak	f	weakf	1
1	mono17	strong	f	strongf	1
1	mono17	strong	f	strongf	1
1	mono17	weak	f	weakf	1
1	mono17	weak	f	weakf	1
1	mono17	strong	f	strongf	1
1	mono17	weak	f	weakf	1
1	mono17	weak	f	weakf	1
1	mono17	strong	f	strongf	1
1	mono17	weak	f	weakf	1
1	mono17	strong	f	strongf	1
1	mono17	strong	f	strongf	1
1	mono17	weak	f	weakf	1
1	mono17	weak	f	weakf	1
1	mono17	strong	f	strongf	1
1	mono17	strong	f	strongf	1
1	mono17	weak	f	weakf	1
1	mono17	weak	f	weakf	1
1	mono17	strong	f	strongf	1
1	mono17	weak	f	weakf	1
1	mono17	strong	f	strongf	1
1	mono17	strong	f	strongf	1
1	mono17	weak	f	weakf	1
1	mono17	weak	f	weakf	1
1	mono17	strong	f	strongf	1
1	mono17	strong	f	strongf	1
1	mono17	weak	f	weakf	1
1	mono17	weak	f	weakf	1
1	mono17	strong	f	strongf	1
1	mono17	weak	f	weakf	1
1	mono17	strong	f	strongf	1
1	mono17	strong	f	strongf	1
1	mono17	weak	f	weakf	1
1	mono17	strong	f	strongf	1
1	mono17	weak	f	weakf	1
1	mono17	strong	f	strongf	1
1	mono17	weak	f	weakf	1
1	mono17	strong	f	strongf	1
1	mono17	weak	f	weakf	1
1	mono17	weak	f	weakf	1
1	mono17	strong	f	strongf	1
1	mono17	strong	f	strongf	1
1	mono17	weak	f	weakf	1
1	mono17	strong	f	strongf	1
1	mono17	weak	f	weakf	1
1	mono17	weak	f	weakf	1
1	mono17	strong	r	strongr	1
1	mono17	strong	f	strongf	1
1	mono17	strong	f	strongf	1
1	mono17	weak	f	weakf	1
1	mono17	weak	f	weakf	1
1	mono17	strong	f	strongf	1
1	mono17	weak	f	weakf	1
1	mono17	strong	f	strongf	1
1	mono17	weak	f	weakf	1
1	mono17	strong	f	strongf	1
1	mono17	weak	f	weakf	1
1	mono17	strong	f	strongf	1
1	mono17	weak	f	weakf	1
1	mono17	weak	f	weakf	1
1	mono17	strong	f	strongf	1
1	mono17	weak	f	weakf	1
1	mono17	strong	f	strongf	1
1	mono17	weak	f	weakf	1
1	mono17	strong	f	strongf	1
1	mono17	weak	f	weakf	1
1	mono17	strong	f	strongf	1
1	mono17	strong	f	strongf	1
1	mono17	weak	f	weakf	1
1	mono18	strong	f	strongf	1
1	mono18	weak	f	weakf	1
1	mono18	strong	f	strongf	1
1	mono18	strong	f	strongf	1
1	mono18	weak	f	weakf	1
1	mono18	weak	f	weakf	1
1	mono18	strong	f	strongf	1
1	mono18	strong	f	strongf	1
1	mono18	weak	f	weakf	1
1	mono18	strong	f	strongf	1
1	mono18	weak	f	weakf	1
1	mono18	weak	f	weakf	1
1	mono18	strong	f	strongf	1
1	mono18	weak	f	weakf	1
1	mono18	strong	f	strongf	1
1	mono18	strong	f	strongf	1
1	mono18	weak	f	weakf	1
1	mono18	weak	f	weakf	1
1	mono18	weak	f	weakf	1
1	mono18	strong	f	strongf	1
1	mono18	weak	f	weakf	1
1	mono18	strong	f	strongf	1
1	mono18	weak	f	weakf	1
1	mono18	strong	f	strongf	1
1	mono18	strong	f	strongf	1
1	mono18	weak	f	weakf	1
1	mono18	strong	f	strongf	1
1	mono18	weak	f	weakf	1
1	mono18	strong	f	strongf	1
1	mono18	weak	f	weakf	1
1	mono18	strong	f	strongf	1
1	mono18	strong	f	strongf	1
1	mono18	weak	f	weakf	1
1	mono18	weak	f	weakf	1
1	mono18	strong	f	strongf	1
1	mono18	weak	f	weakf	1
1	mono18	strong	f	strongf	1
1	mono18	weak	f	weakf	1
1	mono18	weak	f	weakf	1
1	mono18	strong	f	strongf	1
1	mono18	weak	f	weakf	1
1	mono18	strong	f	strongf	1
1	mono18	strong	f	strongf	1
1	mono18	weak	f	weakf	1
1	mono18	weak	f	weakf	1
1	mono18	strong	f	strongf	1
1	mono18	strong	f	strongf	1
1	mono18	weak	f	weakf	1
1	mono18	weak	f	weakf	1
1	mono18	strong	f	strongf	1
1	mono18	weak	f	weakf	1
1	mono18	strong	f	strongf	1
1	mono18	strong	f	strongf	1
1	mono18	weak	f	weakf	1
1	mono18	weak	f	weakf	1
1	mono18	strong	f	strongf	1
1	mono18	weak	f	weakf	1
1	mono18	strong	f	strongf	1
1	mono18	strong	f	strongf	1
1	mono18	weak	f	weakf	1
1	mono18	weak	f	weakf	1
1	mono18	strong	f	strongf	1
1	mono19	strong	f	strongf	1
1	mono19	strong	f	strongf	1
1	mono19	weak	f	weakf	1
1	mono19	strong	f	strongf	1
1	mono19	weak	f	weakf	1
1	mono19	strong	f	strongf	1
1	mono19	weak	f	weakf	1
1	mono19	weak	f	weakf	1
1	mono19	strong	f	strongf	1
1	mono19	strong	f	strongf	1
1	mono19	weak	f	weakf	1
1	mono19	strong	f	strongf	1
1	mono19	weak	f	weakf	1
1	mono19	strong	f	strongf	1
1	mono19	weak	f	weakf	1
1	mono19	strong	f	strongf	1
1	mono19	weak	f	weakf	1
1	mono19	strong	f	strongf	1
1	mono19	strong	f	strongf	1
1	mono19	weak	f	weakf	1
1	mono19	strong	f	strongf	1
1	mono19	weak	f	weakf	1
1	mono19	strong	f	strongf	1
1	mono19	weak	f	weakf	1
1	mono19	strong	f	strongf	1
1	mono19	weak	f	weakf	1
1	mono19	weak	f	weakf	1
1	mono19	strong	f	strongf	1
1	mono19	strong	f	strongf	1
1	mono19	weak	f	weakf	1
1	mono19	weak	f	weakf	1
1	mono19	strong	f	strongf	1
1	mono19	weak	f	weakf	1
1	mono19	strong	f	strongf	1
1	mono19	strong	f	strongf	1
1	mono19	weak	f	weakf	1
1	mono19	strong	f	strongf	1
1	mono19	weak	f	weakf	1
1	mono19	strong	f	strongf	1
1	mono19	weak	f	weakf	1
1	mono19	strong	f	strongf	1
1	mono19	weak	f	weakf	1
1	mono19	strong	f	strongf	1
1	mono19	weak	f	weakf	1
1	mono19	strong	f	strongf	1
1	mono19	strong	f	strongf	1
1	mono19	weak	f	weakf	1
1	mono19	weak	f	weakf	1
1	mono19	strong	f	strongf	1
1	mono19	strong	f	strongf	1
1	mono19	weak	f	weakf	1
1	mono19	strong	f	strongf	1
1	mono19	weak	f	weakf	1
1	mono19	strong	f	strongf	1
1	mono19	strong	f	strongf	1
1	mono19	weak	f	weakf	1
1	mono19	weak	f	weakf	1
1	mono19	strong	f	strongf	1
1	mono19	strong	f	strongf	1
1	mono19	strong	f	strongf	1
1	mono19	weak	f	weakf	1
1	mono19	strong	f	strongf	1
1	mono19	strong	f	strongf	1
1	mono19	weak	f	weakf	1
1	mono20	strong	f	strongf	1
1	mono20	weak	f	weakf	1
1	mono20	strong	f	strongf	1
1	mono20	weak	f	weakf	1
1	mono20	weak	f	weakf	1
1	mono20	strong	f	strongf	1
1	mono20	strong	f	strongf	1
1	mono20	weak	f	weakf	1
1	mono20	weak	f	weakf	1
1	mono20	strong	f	strongf	1
1	mono20	weak	f	weakf	1
1	mono20	strong	f	strongf	1
1	mono20	strong	f	strongf	1
1	mono20	weak	f	weakf	1
1	mono20	weak	f	weakf	1
1	mono20	strong	f	strongf	1
1	mono20	strong	f	strongf	1
1	mono20	weak	f	weakf	1
1	mono20	weak	f	weakf	1
1	mono20	strong	f	strongf	1
1	mono20	weak	f	weakf	1
1	mono20	strong	f	strongf	1
1	mono20	weak	f	weakf	1
1	mono20	strong	f	strongf	1
1	mono20	strong	f	strongf	1
1	mono20	weak	f	weakf	1
1	mono20	strong	f	strongf	1
1	mono20	weak	f	weakf	1
1	mono20	weak	f	weakf	1
1	mono20	strong	f	strongf	1
1	mono20	weak	f	weakf	1
1	mono20	strong	f	strongf	1
1	mono20	strong	f	strongf	1
1	mono20	weak	f	weakf	1
1	mono20	strong	f	strongf	1
1	mono20	weak	f	weakf	1
1	mono20	strong	f	strongf	1
1	mono20	weak	f	weakf	1
1	mono20	weak	f	weakf	1
1	mono20	strong	f	strongf	1
1	mono20	weak	f	weakf	1
1	mono20	strong	f	strongf	1
1	mono20	weak	f	weakf	1
1	mono20	strong	f	strongf	1
1	mono20	strong	f	strongf	1
1	mono20	weak	f	weakf	1
1	mono20	weak	f	weakf	1
1	mono20	strong	f	strongf	1
1	mono20	strong	f	strongf	1
1	mono20	weak	f	weakf	1
1	mono20	strong	f	strongf	1
1	mono20	weak	f	weakf	1
1	mono20	strong	f	strongf	1
1	mono20	weak	f	weakf	1
1	mono20	weak	f	weakf	1
1	mono20	strong	f	strongf	1
1	mono20	strong	f	strongf	1
1	mono20	weak	f	weakf	1
1	mono20	weak	f	weakf	1
1	mono20	strong	f	strongf	1
1	mono20	weak	f	weakf	1
1	mono20	strong	f	strongf	1
1	mono20	weak	f	weakf	1
1	mono20	strong	f	strongf	1
1	mono20	strong	f	strongf	1
1	mono20	weak	f	weakf	1
1	mono20	weak	f	weakf	1
1	mono20	strong	f	strongf	1
1	mono20	weak	f	weakf	1
1	mono20	strong	f	strongf	1
1	mono20	weak	f	weakf	1
1	mono20	strong	f	strongf	1
1	mono21	weak	f	weakf	1
1	mono21	strong	f	strongf	1
1	mono21	strong	f	strongf	1
1	mono21	weak	r	weakr	1
1	mono21	weak	f	weakf	1
1	mono21	weak	f	weakf	1
1	mono21	strong	f	strongf	1
1	mono21	weak	f	weakf	1
1	mono21	strong	f	strongf	1
1	mono21	weak	f	weakf	1
1	mono21	strong	f	strongf	1
1	mono21	strong	f	strongf	1
1	mono21	weak	f	weakf	1
1	mono21	weak	r	weakr	1
1	mono21	weak	f	weakf	1
1	mono21	strong	f	strongf	1
1	mono21	weak	f	weakf	1
1	mono21	strong	f	strongf	1
1	mono21	strong	f	strongf	1
1	mono21	weak	f	weakf	1
1	mono21	weak	f	weakf	1
1	mono21	strong	f	strongf	1
1	mono21	weak	f	weakf	1
1	mono21	strong	f	strongf	1
1	mono21	strong	f	strongf	1
1	mono21	weak	f	weakf	1
1	mono21	weak	f	weakf	1
1	mono21	strong	r	strongr	1
1	mono21	strong	f	strongf	1
1	mono21	weak	f	weakf	1
1	mono21	strong	f	strongf	1
1	mono21	strong	f	strongf	1
1	mono21	weak	f	weakf	1
1	mono21	strong	f	strongf	1
1	mono21	weak	f	weakf	1
1	mono21	weak	f	weakf	1
1	mono21	weak	r	weakr	1
1	mono21	strong	f	strongf	1
1	mono21	strong	f	strongf	1
1	mono21	weak	f	weakf	1
1	mono21	strong	f	strongf	1
1	mono21	weak	f	weakf	1
1	mono21	weak	f	weakf	1
1	mono21	strong	f	strongf	1
1	mono21	weak	f	weakf	1
1	mono21	strong	f	strongf	1
1	mono21	weak	f	weakf	1
1	mono21	strong	f	strongf	1
1	mono21	weak	f	weakf	1
1	mono21	strong	f	strongf	1
1	mono21	strong	r	strongr	1
1	mono21	strong	r	strongr	1
1	mono21	strong	f	strongf	1
1	mono21	weak	f	weakf	1
1	mono21	weak	f	weakf	1
1	mono21	strong	f	strongf	1
1	mono21	weak	r	weakr	1
1	mono21	weak	f	weakf	1
1	mono21	strong	f	strongf	1
1	mono21	strong	f	strongf	1
1	mono21	weak	f	weakf	1
1	mono21	weak	r	weakr	1
1	mono21	strong	f	strongf	1
1	mono21	weak	f	weakf	1
1	mono21	weak	f	weakf	1
1	mono21	strong	f	strongf	1
1	mono21	strong	f	strongf	1
1	mono21	weak	f	weakf	1
1	mono21	strong	f	strongf	1
1	mono21	weak	f	weakf	1
1	mono21	weak	f	weakf	1
1	mono21	strong	f	strongf	1
1	mono21	strong	f	strongf	1
1	mono21	weak	f	weakf	1
1	mono21	weak	f	weakf	1
1	mono21	strong	f	strongf	1
1	mono21	weak	r	weakr	1
1	mono21	strong	f	strongf	1
1	mono21	weak	f	weakf	1
1	mono21	weak	f	weakf	1
1	mono21	strong	f	strongf	1
1	mono22	strong	f	strongf	1
1	mono22	weak	f	weakf	1
1	mono22	weak	f	weakf	1
1	mono22	strong	f	strongf	1
1	mono22	weak	f	weakf	1
1	mono22	strong	f	strongf	1
1	mono22	weak	f	weakf	1
1	mono22	strong	f	strongf	1
1	mono22	weak	f	weakf	1
1	mono22	strong	f	strongf	1
1	mono22	strong	f	strongf	1
1	mono22	weak	f	weakf	1
1	mono22	strong	f	strongf	1
1	mono22	weak	f	weakf	1
1	mono22	strong	f	strongf	1
1	mono22	weak	f	weakf	1
1	mono22	strong	f	strongf	1
1	mono22	weak	f	weakf	1
1	mono22	weak	f	weakf	1
1	mono22	strong	f	strongf	1
1	mono22	strong	f	strongf	1
1	mono22	weak	f	weakf	1
1	mono22	strong	f	strongf	1
1	mono22	weak	f	weakf	1
1	mono22	strong	f	strongf	1
1	mono22	weak	f	weakf	1
1	mono22	strong	f	strongf	1
1	mono22	weak	f	weakf	1
1	mono22	weak	f	weakf	1
1	mono22	strong	f	strongf	1
1	mono22	strong	f	strongf	1
1	mono22	weak	f	weakf	1
1	mono22	weak	r	weakr	1
1	mono22	strong	f	strongf	1
1	mono22	weak	f	weakf	1
1	mono22	weak	f	weakf	1
1	mono22	strong	f	strongf	1
1	mono22	strong	f	strongf	1
1	mono22	weak	f	weakf	1
1	mono22	weak	f	weakf	1
1	mono22	strong	f	strongf	1
1	mono22	weak	f	weakf	1
1	mono22	strong	f	strongf	1
1	mono22	strong	f	strongf	1
1	mono22	weak	f	weakf	1
1	mono22	weak	f	weakf	1
1	mono22	strong	f	strongf	1
1	mono22	strong	f	strongf	1
1	mono22	weak	f	weakf	1
1	mono22	weak	f	weakf	1
1	mono22	strong	f	strongf	1
1	mono22	weak	f	weakf	1
1	mono22	strong	f	strongf	1
1	mono22	strong	f	strongf	1
1	mono22	weak	f	weakf	1
1	mono22	weak	f	weakf	1
1	mono22	strong	f	strongf	1
1	mono22	weak	f	weakf	1
1	mono22	strong	f	strongf	1
1	mono22	strong	f	strongf	1
1	mono22	weak	f	weakf	1
1	mono22	weak	f	weakf	1
1	mono22	strong	f	strongf	1
1	mono22	strong	f	strongf	1
1	mono22	weak	f	weakf	1
1	mono22	strong	f	strongf	1
1	mono22	weak	f	weakf	1
1	mono22	weak	f	weakf	1
1	mono22	strong	f	strongf	1
1	mono22	weak	f	weakf	1
1	mono22	strong	f	strongf	1
1	mono22	strong	f	strongf	1
1	mono22	weak	f	weakf	1
1	mono23	strong	f	strongf	1
1	mono23	weak	f	weakf	1
1	mono23	weak	f	weakf	1
1	mono23	strong	f	strongf	1
1	mono23	strong	f	strongf	1
1	mono23	weak	f	weakf	1
1	mono23	strong	f	strongf	1
1	mono23	strong	f	strongf	1
1	mono23	weak	f	weakf	1
1	mono23	strong	f	strongf	1
1	mono23	weak	f	weakf	1
1	mono23	strong	f	strongf	1
1	mono23	weak	f	weakf	1
1	mono23	strong	f	strongf	1
1	mono23	weak	f	weakf	1
1	mono23	strong	f	strongf	1
1	mono23	strong	f	strongf	1
1	mono23	strong	f	strongf	1
1	mono23	strong	f	strongf	1
1	mono23	strong	f	strongf	1
1	mono23	strong	f	strongf	1
1	mono23	strong	f	strongf	1
1	mono23	strong	f	strongf	1
1	mono23	strong	f	strongf	1
1	mono23	weak	f	weakf	1
1	mono23	strong	f	strongf	1
1	mono23	weak	f	weakf	1
1	mono23	strong	f	strongf	1
1	mono23	weak	f	weakf	1
1	mono23	weak	f	weakf	1
1	mono23	strong	f	strongf	1
1	mono23	weak	f	weakf	1
1	mono23	strong	f	strongf	1
1	mono23	weak	f	weakf	1
1	mono23	strong	f	strongf	1
1	mono23	weak	f	weakf	1
1	mono23	weak	f	weakf	1
1	mono23	weak	f	weakf	1
1	mono23	weak	f	weakf	1
1	mono23	strong	f	strongf	1
1	mono23	weak	f	weakf	1
1	mono24	strong	f	strongf	1
1	mono24	weak	r	weakr	1
1	mono24	weak	f	weakf	1
1	mono24	weak	f	weakf	1
1	mono24	strong	f	strongf	1
1	mono24	weak	f	weakf	1
1	mono24	strong	f	strongf	1
1	mono24	strong	f	strongf	1
1	mono24	weak	f	weakf	1
1	mono24	weak	f	weakf	1
1	mono24	strong	f	strongf	1
1	mono24	strong	f	strongf	1
1	mono24	weak	f	weakf	1
1	mono24	weak	f	weakf	1
1	mono24	strong	f	strongf	1
1	mono24	strong	f	strongf	1
1	mono24	weak	f	weakf	1
1	mono24	strong	f	strongf	1
1	mono24	strong	r	strongr	1
1	mono24	weak	f	weakf	1
1	mono24	strong	f	strongf	1
1	mono24	weak	f	weakf	1
1	mono24	weak	f	weakf	1
1	mono24	strong	f	strongf	1
1	mono24	weak	f	weakf	1
1	mono24	strong	f	strongf	1
1	mono24	strong	f	strongf	1
1	mono24	weak	f	weakf	1
1	mono24	strong	f	strongf	1
1	mono24	weak	f	weakf	1
1	mono24	strong	f	strongf	1
1	mono24	weak	f	weakf	1
1	mono24	weak	f	weakf	1
1	mono24	strong	f	strongf	1
1	mono24	strong	f	strongf	1
1	mono24	weak	f	weakf	1
1	mono24	weak	f	weakf	1
1	mono24	strong	f	strongf	1
1	mono24	weak	f	weakf	1
1	mono24	strong	f	strongf	1
1	mono24	weak	f	weakf	1
1	mono24	strong	f	strongf	1
1	mono24	strong	f	strongf	1
1	mono24	weak	f	weakf	1
1	mono24	strong	f	strongf	1
1	mono24	weak	f	weakf	1
1	mono24	strong	r	strongr	1
1	mono24	weak	f	weakf	1
1	mono24	strong	f	strongf	1
1	mono24	strong	f	strongf	1
1	mono24	strong	f	strongf	1
1	mono24	weak	f	weakf	1
1	mono24	weak	r	weakr	1
1	mono24	weak	f	weakf	1
1	mono24	strong	r	strongr	1
1	mono24	strong	f	strongf	1
1	mono24	weak	f	weakf	1
1	mono24	strong	f	strongf	1
1	mono24	strong	f	strongf	1
1	mono24	weak	f	weakf	1
1	mono24	strong	f	strongf	1
1	mono24	weak	f	weakf	1
1	mono24	weak	f	weakf	1
1	mono24	strong	f	strongf	1
1	mono24	strong	f	strongf	1
1	mono24	weak	f	weakf	1
1	mono24	strong	f	strongf	1
1	mono24	weak	r	weakr	1
1	mono24	weak	f	weakf	1
1	mono24	strong	f	strongf	1
1	mono24	weak	f	weakf	1
1	mono24	weak	f	weakf	1
1	mono24	strong	f	strongf	1
1	mono24	weak	f	weakf	1
1	mono24	strong	f	strongf	1
1	mono24	weak	f	weakf	1
1	mono24	strong	f	strongf	1
1	mono25	strong	f	strongf	1
1	mono25	weak	f	weakf	1
1	mono25	strong	f	strongf	1
1	mono25	weak	f	weakf	1
1	mono25	strong	f	strongf	1
1	mono25	strong	f	strongf	1
1	mono25	strong	f	strongf	1
1	mono25	weak	f	weakf	1
1	mono25	strong	f	strongf	1
1	mono25	strong	f	strongf	1
1	mono25	weak	f	weakf	1
1	mono25	weak	f	weakf	1
1	mono25	weak	f	weakf	1
1	mono25	weak	f	weakf	1
1	mono25	strong	f	strongf	1
1	mono25	strong	f	strongf	1
1	mono25	strong	f	strongf	1
1	mono25	strong	f	strongf	1
1	mono25	weak	f	weakf	1
1	mono25	strong	f	strongf	1
1	mono25	strong	f	strongf	1
1	mono25	strong	f	strongf	1
1	mono25	weak	f	weakf	1
1	mono25	weak	f	weakf	1
1	mono25	weak	f	weakf	1
1	mono25	strong	f	strongf	1
1	mono25	strong	f	strongf	1
1	mono25	strong	f	strongf	1
1	mono25	weak	f	weakf	1
1	mono25	weak	f	weakf	1
1	mono25	weak	f	weakf	1
1	mono25	strong	f	strongf	1
1	mono25	strong	f	strongf	1
1	mono26	weak	f	weakf	1
1	mono26	weak	f	weakf	1
1	mono27	strong	f	strongf	1
1	mono27	weak	f	weakf	1
1	mono27	strong	f	strongf	1
1	mono27	weak	f	weakf	1
1	mono27	strong	f	strongf	1
1	mono27	weak	f	weakf	1
1	mono27	strong	f	strongf	1
1	mono27	weak	f	weakf	1
1	mono27	weak	f	weakf	1
1	mono27	strong	f	strongf	1
1	mono27	strong	f	strongf	1
1	mono27	weak	f	weakf	1
1	mono27	weak	f	weakf	1
1	mono27	strong	f	strongf	1
1	mono27	weak	f	weakf	1
1	mono27	strong	f	strongf	1
1	mono27	strong	f	strongf	1
1	mono27	weak	f	weakf	1
1	mono27	strong	f	strongf	1
1	mono27	weak	f	weakf	1
1	mono27	strong	f	strongf	1
1	mono27	weak	f	weakf	1
1	mono27	strong	f	strongf	1
1	mono27	weak	f	weakf	1
1	mono27	weak	f	weakf	1
1	mono27	strong	f	strongf	1
1	mono27	weak	f	weakf	1
1	mono27	strong	f	strongf	1
1	mono27	strong	f	strongf	1
1	mono27	weak	f	weakf	1
1	mono27	weak	f	weakf	1
1	mono27	strong	f	strongf	1
1	mono27	weak	f	weakf	1
1	mono27	strong	f	strongf	1
1	mono27	strong	r	strongr	1
1	mono27	weak	f	weakf	1
1	mono27	strong	f	strongf	1
1	mono27	strong	f	strongf	1
1	mono27	weak	f	weakf	1
1	mono27	weak	f	weakf	1
1	mono27	strong	f	strongf	1
1	mono27	weak	f	weakf	1
1	mono27	strong	f	strongf	1
1	mono27	strong	f	strongf	1
1	mono27	weak	f	weakf	1
1	mono27	weak	f	weakf	1
1	mono27	strong	f	strongf	1
1	mono27	weak	f	weakf	1
1	mono27	strong	f	strongf	1
1	mono27	weak	f	weakf	1
1	mono27	strong	f	strongf	1
1	mono27	strong	f	strongf	1
1	mono27	weak	f	weakf	1
1	mono27	strong	f	strongf	1
1	mono27	weak	f	weakf	1
1	mono27	weak	f	weakf	1
1	mono27	strong	f	strongf	1
1	mono27	strong	f	strongf	1
1	mono27	weak	f	weakf	1
1	mono27	strong	f	strongf	1
1	mono27	weak	f	weakf	1
1	mono27	strong	f	strongf	1
1	mono27	weak	f	weakf	1
1	mono27	strong	f	strongf	1
1	mono27	weak	f	weakf	1
1	mono27	strong	f	strongf	1
1	mono27	weak	f	weakf	1
1	mono27	strong	f	strongf	1
1	mono27	weak	f	weakf	1
1	mono27	strong	f	strongf	1
1	mono27	weak	f	weakf	1
1	mono27	weak	f	weakf	1
1	mono27	strong	f	strongf	1
1	mono28	strong	f	strongf	1
1	mono28	weak	f	weakf	1
1	mono28	weak	r	weakr	1
1	mono28	weak	f	weakf	1
1	mono28	strong	f	strongf	1
1	mono28	weak	f	weakf	1
1	mono28	weak	r	weakr	1
1	mono28	strong	f	strongf	1
1	mono28	weak	f	weakf	1
1	mono28	strong	f	strongf	1
1	mono28	weak	f	weakf	1
1	mono28	strong	f	strongf	1
1	mono28	weak	f	weakf	1
1	mono28	strong	f	strongf	1
1	mono28	weak	f	weakf	1
1	mono28	strong	f	strongf	1
1	mono28	weak	f	weakf	1
1	mono28	strong	f	strongf	1
1	mono28	weak	f	weakf	1
1	mono28	strong	f	strongf	1
1	mono28	strong	f	strongf	1
1	mono28	weak	f	weakf	1
1	mono28	weak	f	weakf	1
1	mono28	strong	f	strongf	1
1	mono28	strong	f	strongf	1
1	mono28	weak	f	weakf	1
1	mono28	strong	f	strongf	1
1	mono28	weak	f	weakf	1
1	mono28	strong	f	strongf	1
1	mono28	weak	f	weakf	1
1	mono28	strong	f	strongf	1
1	mono28	weak	f	weakf	1
1	mono28	weak	f	weakf	1
1	mono28	strong	f	strongf	1
1	mono28	weak	f	weakf	1
1	mono28	strong	f	strongf	1
1	mono28	weak	f	weakf	1
1	mono28	strong	f	strongf	1
1	mono28	weak	f	weakf	1
1	mono28	strong	f	strongf	1
1	mono28	strong	f	strongf	1
1	mono28	weak	f	weakf	1
1	mono28	weak	f	weakf	1
1	mono28	strong	f	strongf	1
1	mono28	weak	f	weakf	1
1	mono28	strong	f	strongf	1
1	mono28	strong	f	strongf	1
1	mono28	strong	f	strongf	1
1	mono28	weak	f	weakf	1
1	mono28	strong	f	strongf	1
1	mono28	weak	f	weakf	1
1	mono28	strong	f	strongf	1
1	mono28	weak	f	weakf	1
1	mono28	weak	f	weakf	1
1	mono28	strong	f	strongf	1
1	mono28	strong	f	strongf	1
1	mono28	weak	f	weakf	1
1	mono28	strong	f	strongf	1
1	mono28	weak	f	weakf	1
1	mono28	strong	f	strongf	1
1	mono28	weak	f	weakf	1
1	mono28	strong	f	strongf	1
1	mono28	weak	f	weakf	1
1	mono28	weak	f	weakf	1
1	mono28	strong	f	strongf	1
1	mono28	weak	f	weakf	1
1	mono28	strong	f	strongf	1
1	mono28	weak	f	weakf	1
1	mono28	strong	f	strongf	1
1	mono28	strong	r	strongr	1
1	mono28	strong	f	strongf	1
1	mono28	weak	f	weakf	1
1	mono28	weak	f	weakf	1
1	mono29	strong	f	strongf	1
1	mono29	weak	r	weakr	1
1	mono29	weak	f	weakf	1
1	mono29	weak	f	weakf	1
1	mono29	weak	r	weakr	1
1	mono29	strong	f	strongf	1
1	mono29	weak	f	weakf	1
1	mono29	strong	f	strongf	1
1	mono29	weak	f	weakf	1
1	mono29	strong	f	strongf	1
1	mono29	strong	f	strongf	1
1	mono29	weak	f	weakf	1
1	mono29	weak	f	weakf	1
1	mono29	strong	f	strongf	1
1	mono29	strong	f	strongf	1
1	mono29	weak	f	weakf	1
1	mono29	strong	f	strongf	1
1	mono29	weak	f	weakf	1
1	mono29	strong	f	strongf	1
1	mono29	strong	r	strongr	1
1	mono29	weak	f	weakf	1
1	mono29	strong	f	strongf	1
1	mono29	weak	f	weakf	1
1	mono29	strong	f	strongf	1
1	mono29	strong	r	strongr	1
1	mono29	weak	f	weakf	1
1	mono29	weak	f	weakf	1
1	mono29	strong	f	strongf	1
1	mono29	weak	f	weakf	1
1	mono29	strong	f	strongf	1
1	mono29	strong	f	strongf	1
1	mono29	weak	f	weakf	1
1	mono29	strong	f	strongf	1
1	mono29	weak	f	weakf	1
1	mono29	weak	f	weakf	1
1	mono29	strong	f	strongf	1
1	mono29	strong	f	strongf	1
1	mono29	weak	f	weakf	1
1	mono29	strong	f	strongf	1
1	mono29	weak	f	weakf	1
1	mono29	weak	f	weakf	1
1	mono29	strong	f	strongf	1
1	mono29	weak	f	weakf	1
1	mono29	strong	f	strongf	1
1	mono29	strong	f	strongf	1
1	mono29	weak	f	weakf	1
1	mono29	weak	f	weakf	1
1	mono29	strong	f	strongf	1
1	mono29	strong	f	strongf	1
1	mono29	weak	f	weakf	1
1	mono29	weak	f	weakf	1
1	mono29	strong	f	strongf	1
1	mono29	strong	f	strongf	1
1	mono29	weak	f	weakf	1
1	mono29	weak	f	weakf	1
1	mono29	strong	f	strongf	1
1	mono29	weak	f	weakf	1
1	mono29	strong	f	strongf	1
1	mono29	weak	f	weakf	1
1	mono29	strong	f	strongf	1
1	mono29	strong	f	strongf	1
1	mono29	weak	f	weakf	1
1	mono29	weak	f	weakf	1
1	mono29	strong	f	strongf	1
1	mono29	strong	f	strongf	1
1	mono29	weak	f	weakf	1
1	mono29	strong	f	strongf	1
1	mono29	weak	f	weakf	1
1	mono29	strong	f	strongf	1
1	mono29	weak	f	weakf	1
1	mono29	strong	f	strongf	1
1	mono29	weak	f	weakf	1
1	mono29	weak	f	weakf	1
1	mono29	strong	f	strongf	1
1	mono29	strong	f	strongf	1
1	mono29	weak	f	weakf	1
1	mono30	strong	f	strongf	1
1	mono30	weak	f	weakf	1
1	mono30	strong	f	strongf	1
1	mono30	weak	f	weakf	1
1	mono30	strong	f	strongf	1
1	mono30	weak	f	weakf	1
1	mono30	strong	f	strongf	1
1	mono30	weak	f	weakf	1
1	mono30	strong	f	strongf	1
1	mono30	strong	f	strongf	1
1	mono30	weak	f	weakf	1
1	mono30	strong	f	strongf	1
1	mono30	weak	f	weakf	1
1	mono30	strong	f	strongf	1
1	mono30	weak	f	weakf	1
1	mono30	strong	f	strongf	1
1	mono30	weak	f	weakf	1
1	mono30	strong	f	strongf	1
1	mono30	weak	f	weakf	1
1	mono30	strong	f	strongf	1
1	mono30	weak	f	weakf	1
1	mono30	strong	f	strongf	1
1	mono30	strong	f	strongf	1
1	mono30	weak	f	weakf	1
1	mono30	weak	f	weakf	1
1	mono30	strong	f	strongf	1
1	mono30	strong	f	strongf	1
1	mono30	weak	f	weakf	1
1	mono30	weak	f	weakf	1
1	mono30	strong	f	strongf	1
1	mono30	weak	f	weakf	1
1	mono30	strong	f	strongf	1
1	mono30	weak	f	weakf	1
1	mono30	strong	f	strongf	1
1	mono30	weak	r	weakr	1
1	mono30	weak	f	weakf	1
1	mono30	strong	f	strongf	1
1	mono30	strong	f	strongf	1
1	mono30	weak	f	weakf	1
1	mono30	weak	f	weakf	1
1	mono30	strong	f	strongf	1
1	mono30	weak	f	weakf	1
1	mono30	weak	f	weakf	1
1	mono30	strong	f	strongf	1
1	mono30	strong	f	strongf	1
1	mono30	weak	f	weakf	1
1	mono30	strong	f	strongf	1
1	mono30	strong	f	strongf	1
1	mono30	weak	f	weakf	1
1	mono30	strong	f	strongf	1
1	mono30	strong	f	strongf	1
1	mono30	weak	f	weakf	1
1	mono30	weak	f	weakf	1
1	mono30	strong	f	strongf	1
1	mono30	strong	f	strongf	1
1	mono30	weak	f	weakf	1
1	mono30	strong	f	strongf	1
1	mono30	weak	f	weakf	1
1	mono30	weak	f	weakf	1
1	mono30	strong	f	strongf	1
1	mono30	weak	f	weakf	1
1	mono30	strong	f	strongf	1
1	mono31	weak	f	weakf	1
1	mono31	strong	f	strongf	1
1	mono31	strong	f	strongf	1
1	mono31	weak	f	weakf	1
1	mono31	strong	f	strongf	1
1	mono31	weak	f	weakf	1
1	mono31	strong	f	strongf	1
1	mono31	weak	f	weakf	1
1	mono31	weak	f	weakf	1
1	mono31	strong	f	strongf	1
1	mono31	strong	f	strongf	1
1	mono31	weak	f	weakf	1
1	mono31	weak	f	weakf	1
1	mono31	strong	f	strongf	1
1	mono31	strong	f	strongf	1
1	mono31	weak	f	weakf	1
1	mono31	strong	f	strongf	1
1	mono31	weak	f	weakf	1
1	mono31	weak	r	weakr	1
1	mono31	weak	f	weakf	1
1	mono31	strong	f	strongf	1
1	mono31	weak	f	weakf	1
1	mono31	strong	f	strongf	1
1	mono31	strong	f	strongf	1
1	mono31	weak	f	weakf	1
1	mono31	strong	f	strongf	1
1	mono31	weak	f	weakf	1
1	mono31	weak	f	weakf	1
1	mono31	strong	f	strongf	1
1	mono31	weak	f	weakf	1
1	mono31	strong	f	strongf	1
1	mono31	strong	f	strongf	1
1	mono31	weak	f	weakf	1
1	mono31	weak	f	weakf	1
1	mono31	strong	f	strongf	1
1	mono31	weak	f	weakf	1
[truncated: 6,353 more rows]
