# Supplementary material for: Investigating Heritage Language Processing: Meaning Composition in Chinese Classifier-Noun Phrasal Contexts
Source: Front Psychol. 2021 Dec 17;12:782016. doi: 10.3389/fpsyg.2021.782016 (PMC8718634; doi:10.3389/fpsyg.2021.782016)
Supplement: Supplementary file 2 [file Data_Sheet_2.XLSX]

## Sheet: N400
ID	Group	bin9_CZ	bin9_CP1	bin9_CPZ	bin9_CP2	bin9_PZ	bin10_CZ	bin10_CP1	bin10_CPZ	bin10_CP2	bin10_PZ	bin11_CZ	bin11_CP1	bin11_CPZ	bin11_CP2	bin11_PZ	bin12_CZ	bin12_CP1	bin12_CPZ	bin12_CP2	bin12_PZ
sub01	mono	-2.02572	-2.00457	-1.27956	-2.14445	-0.17309	-4.40036	-3.76166	-3.78857	-1.52106	-1.93697	-5.85057	-6.5152	-5.71078	-6.07615	-4.36627	-1.56741	-1.46835	-0.896639	1.13961	-0.172414
sub02	mono	1.09839	0.358548	-0.402447	0.987456	0.753675	-3.89174	-3.34795	-2.99973	-4.1506	-2.62525	-1.10173	-0.388186	-1.0529	-1.17156	-1.37139	0.38694	-0.207633	-1.09268	-0.265259	-1.78212
sub03	mono	1.10997	0.703057	0.750242	0.669372	-0.231246	2.23259	0.253624	1.84654	2.59364	0.74535	0.854732	-1.11892	0.06412	0.500377	-0.994496	-2.85432	-2.212	-2.08637	-1.62751	-2.46848
sub04	mono	2.59365	3.07076	2.95986	3.76143	3.26032	-0.12607	-0.298235	-0.647187	1.28346	0.698742	4.20339	4.73478	4.49594	5.13875	4.90422	-1.15701	1.4435	0.191481	0.875345	1.55036
sub05	mono	2.49331	-0.724485	1.66993	0.470046	0.40783	-0.657344	0.614595	-0.124799	-1.06806	0.758063	0.858551	4.38371	4.1837	4.33031	4.12486	3.4523	1.96191	2.62097	3.03675	3.47154
sub06	mono	4.3245	3.07846	4.30608	3.82272	3.27596	5.86686	3.61406	5.84525	4.71586	4.27835	5.46865	5.28373	5.46089	5.32498	5.07527	1.42039	1.35122	1.42527	2.3797	2.46726
sub07	mono	1.0514	3.09756	3.6157	3.06192	5.82555	-1.31955	0.759972	0.586447	0.290954	2.55473	1.58901	3.22528	4.22515	4.29574	5.81879	-4.08108	-1.83872	-1.02339	-1.47831	0.13178
sub08	mono	1.07061	1.09641	1.07224	0.73314	1.78378	-3.59461	-4.13764	-3.59513	-2.11055	-2.5983	-0.777873	-0.098824	-0.769285	-0.332129	1.5613	-0.240234	-0.362708	-0.164953	-1.39781	0.179333
sub09	mono	7.31078	7.19628	7.53432	9.36646	8.77522	3.25812	3.24988	3.44943	4.82433	3.6336	3.84367	4.56396	4.15323	6.15743	6.06542	1.4899	1.27783	1.81045	3.51298	2.93081
sub10	mono	-4.37428	-1.53472	-4.30671	-2.68989	-1.60206	-3.68613	-0.940386	-3.65247	-2.47516	-1.35955	-4.20767	-0.884778	-4.16294	-3.01566	-0.602494	-3.78304	-1.35238	-3.71701	-2.98707	-1.12929
sub11	mono	1.63921	2.34543	1.66954	2.36565	3.78544	-2.17463	-1.16446	-2.10758	-1.47108	-1.00675	-2.24843	-1.38513	-2.2497	-2.82653	-0.801821	-1.84298	-0.498036	-1.77531	-0.267653	0.511596
sub12	mono	-0.15254	0.952571	0.521133	0.597247	2.11577	-5.07477	-3.83426	-4.17205	-2.89706	-1.17822	-0.536612	-0.224576	0.180857	0.452871	0.681678	-7.4772	-6.14704	-6.6872	-5.58304	-4.22368
sub13	mono	-1.7419	-0.076593	-0.015237	-0.127145	0.546772	-0.829729	0.914165	0.602416	0.732683	1.32962	0.073957	1.19508	1.12337	1.02584	1.26113	-1.06731	1.3957	1.4501	1.08524	2.7365
sub14	mono	2.60161	3.58657	2.62527	0.828601	2.90829	-2.01367	-1.46152	-2.04803	-0.404344	-1.81277	-2.09414	-1.80269	-2.05073	-3.63097	-2.02157	-0.983627	0.217699	-0.960041	0.386118	0.147648
sub15	mono	-0.951495	0.814778	-0.938225	-0.994413	1.39739	-4.75447	-2.70599	-4.72113	-3.32618	-1.91794	-3.73713	-1.53527	-3.69841	-3.33117	-1.18686	-3.1121	-0.830875	-3.12558	-2.5524	-1.38927
sub16	mono	2.8083	4.27167	4.06098	3.28359	4.44999	-2.33499	-0.652136	-2.76899	-3.26531	-1.94217	2.7016	3.35907	2.50159	4.01243	4.3272	1.95731	1.90743	0.796894	3.02508	2.47342
sub17	mono	0.768281	6.23775	3.0257	2.50959	3.82254	-4.9131	0.928192	-1.91383	-0.647374	0.049888	-0.507893	3.3592	1.25388	2.00334	1.82729	-2.59912	1.05822	-1.40364	-0.383256	1.11376
sub18	mono	2.72644	4.92498	4.62836	7.36721	4.87883	1.20064	1.67769	1.94862	3.15978	2.01355	5.10804	6.60725	5.86089	8.97073	5.79563	-0.525145	1.34013	-1.16404	2.28362	1.73818
sub19	mono	1.79433	3.60276	2.72415	2.11295	3.31234	0.350275	1.88001	0.396436	1.82024	0.509621	4.50005	6.125	5.25671	4.60225	5.40796	-0.651407	1.51676	0.597951	1.67532	-0.227141
sub20	mono	1.55716	3.53015	2.11065	3.32013	3.64534	0.19575	1.30237	0.870074	2.14132	2.46588	2.72795	4.78735	3.41736	3.81383	4.50861	3.61243	5.19527	4.10301	4.80739	4.40057
sub21	mono	0.826571	2.5917	0.854901	3.87934	2.32316	-6.20441	-3.31796	-6.17143	-4.95632	-4.79297	-4.86614	-3.83932	-4.88415	-4.12658	-2.68019	-7.75898	-5.74753	-7.73923	-5.38955	-5.35691
sub22	mono	4.4056	6.20207	4.43253	7.48609	8.15575	-2.8488	-1.10533	-2.82417	0.118059	1.21308	3.65786	3.39475	3.7298	4.61539	7.64298	-1.40373	-1.36754	-1.37755	2.51282	3.90934
sub23	mono	-2.6229	-1.12703	-1.54107	0.321194	-0.563582	0.640336	3.00067	-0.027079	2.52406	1.45712	-0.014575	-1.19999	0.34592	0.255459	-0.012774	-0.873461	0.389465	0.034217	1.09112	1.55127
sub24	mono	-1.38875	-0.310782	-1.39023	-0.151894	0.311056	-7.26122	-4.69341	-7.22424	-5.73918	-4.85791	-0.692032	1.09705	-0.70421	0.323438	0.073901	-6.72334	-3.24552	-6.67331	-4.5857	-4.29
sub25	mono	-2.11091	0.524708	-0.409951	-1.45884	2.16732	-2.67806	-1.97148	-2.4877	-2.65125	-0.156601	-2.94776	-1.65981	-1.8753	-2.43352	0.264274	-4.59814	-2.76419	-3.94331	-3.70773	-1.18804
sub26	mono	1.87572	3.10227	3	2.23005	3.84464	-0.247773	-0.094346	-0.006299	0.054068	-0.140137	0.659528	1.44441	1.11699	1.17281	2.01486	-0.287016	1.33331	0.42604	1.28817	2.43071
sub27	mono	1.53069	1.87033	2.81103	3.47578	6.62016	-0.367089	0.160319	0.721831	1.67277	3.2906	0.663267	1.95424	2.23514	2.72798	5.1795	-0.335183	1.14074	1.70405	2.20989	5.73728
sub28	mono	-1.46229	-0.50903	-0.82732	1.15361	1.13706	-5.35825	-0.657637	-2.93778	-3.29892	-0.91605	-1.50108	-0.352321	-1.41724	-0.676701	-0.951254	-2.47342	-2.06095	-1.00095	0.219641	0.523418
sub29	mono	-6.60448	-2.22678	-6.60246	-4.86293	-3.17532	-10.8887	-6.68384	-10.9082	-8.91928	-8.31912	-5.8839	-3.23909	-5.91061	-5.35686	-3.65942	-7.8229	-3.56631	-7.78987	-6.07279	-4.77034
sub30	mono	7.53839	8.51037	7.51562	9.203	2.26706	2.71958	3.69497	2.76421	6.21348	2.08502	3.49499	3.40384	3.50157	4.05983	1.7955	3.76356	5.06328	3.77532	5.65845	3.16392
sub31	mono	7.62614	8.98053	7.61016	7.10289	9.11135	3.50415	4.44872	3.66171	6.06927	6.95902	5.6409	6.35026	5.90947	6.93738	7.81564	2.74693	4.14187	2.89317	4.18093	4.97851
sub32	mono	5.41034	7.44036	7.1813	6.26431	4.28865	3.12717	4.14732	3.95363	3.23853	2.38968	7.53388	8.81049	8.23451	6.79596	5.85481	6.14115	6.40057	6.94469	6.65444	3.42677
sub03_l2	bi	-4.90938	-0.991139	-1.3444	0.583497	-0.127814	-3.00603	-1.67898	-1.00218	1.82207	-0.810518	-6.51099	-3.08967	-3.31565	-0.162276	-2.02778	-7.19217	-4.29726	-4.57267	-0.85231	-3.43134
sub04_l2	bi	0.010434	0.892299	0.146028	2.80862	0.370205	-0.49604	-1.18842	-0.47427	0.741012	-1.70991	1.51589	1.69543	1.58292	3.4941	1.55136	-2.31462	-1.65534	-2.19255	0.89583	-1.96562
sub06_l2	bi	-0.980296	1.83037	1.60447	4.0097	4.81632	-1.40489	0.944985	0.24159	0.710184	1.61291	-1.62795	1.33549	0.432231	0.826583	2.49314	-3.59948	-1.12193	-2.13876	0.371634	-0.126473
sub07_l2	bi	0.118888	0.301799	0.627599	3.52022	0.29381	-0.366454	-0.176824	-0.344313	2.65001	-0.467452	1.41742	1.0406	0.847678	2.81825	-0.580067	0.772111	1.13411	1.83306	3.16567	1.30611
sub08_l2	bi	0.730406	-1.13862	0.760832	2.6666	0.846853	2.65888	2.13686	2.65149	4.02668	2.46469	2.23715	0.858146	2.2514	2.97228	1.37653	2.66405	1.59817	2.61206	3.38777	2.74217
sub11_l2	bi	2.75225	2.2001	2.76798	5.13719	2.40823	2.57897	0.765349	2.60833	3.78152	2.37432	4.32195	3.29189	4.31482	5.35349	3.99598	2.81173	1.5072	2.80663	3.14374	2.7948
sub12_l2	bi	4.31857	4.9608	5.78599	4.59844	7.06074	-2.56185	-1.50874	-1.84686	-1.87203	-1.1899	0.330433	0.749139	1.94048	1.11986	2.92429	-0.27335	0.376914	0.22112	0.311985	1.39135
sub13_l2	bi	5.61772	3.58214	5.61167	6.95432	3.28898	0.858178	-0.463978	0.82582	3.13518	0.040983	3.64478	3.15752	3.6332	4.17708	0.911721	3.75582	3.08826	3.73232	4.01333	0.439821
sub15_l2	bi	3.01769	5.77504	4.56198	5.68133	7.41021	1.99935	4.59811	2.95312	3.81187	4.96123	2.89847	5.74416	4.34567	4.02314	4.64032	0.121661	2.73782	1.18446	1.50477	2.69204
sub16_l2	bi	3.02452	4.89393	5.02489	5.52473	6.20213	-1.2146	-0.1765	-0.431704	-0.233442	1.63557	2.83869	2.929	3.35962	3.63483	5.29228	-1.4754	-0.87853	-0.269231	0.028538	2.41342
sub17_l2	bi	2.53101	3.9372	4.79	4.86461	6.55876	-0.994103	-0.506485	-0.027575	0.388516	1.2129	0.129477	0.9409	1.87765	2.11166	1.73191	-1.73205	0.423825	0.493305	0.833096	3.01235
sub19_l2	bi	-3.46263	-1.16126	-3.4545	0.041189	1.02454	-6.69256	-4.12634	-6.66954	-2.94157	-0.659553	-2.52796	-0.8009	-2.48396	0.227567	1.01764	-3.49397	-1.25928	-3.43212	0.540618	1.67846
sub24_l2	bi	1.96311	1.54795	2.40904	3.96105	1.87195	1.06292	2.17366	2.10726	3.94581	2.1686	3.21592	3.36001	3.73916	4.37427	3.49408	4.67297	4.82597	4.4904	6.06476	3.24406
sub25_l2	bi	-3.66229	-1.22468	-1.54034	0.229461	0.467147	-1.35667	-0.259273	-0.333348	0.629084	0.921347	-1.31251	-0.565432	0.257015	2.41939	1.02526	-3.32749	-1.52774	-1.36582	1.4927	-0.200581
sub26_l2	bi	2.75845	4.35543	3.35381	4.17904	2.27525	-0.430704	0.36803	-0.738134	-0.883271	-1.77245	4.31653	4.62582	4.85646	4.14493	3.71854	1.97714	2.95926	2.5085	1.8193	3.13266
sub27_l2	bi	2.35651	1.60762	2.52949	4.09416	1.12333	-0.437363	-0.773443	-0.20502	2.08709	-0.577174	2.4819	0.807728	2.50472	4.44958	0.933332	5.21505	1.9505	3.93699	5.37642	2.73405
sub28_l2	bi	1.85701	1.41654	1.77397	2.62813	3.14294	2.80086	0.808864	1.44944	1.65794	0.185545	0.985961	2.98527	1.24768	2.24877	2.48548	0.708673	0.438893	0.685636	1.00576	0.482126
sub29_l2	bi	0.112944	0.807232	0.102035	-0.02272	0.120613	-4.65767	-3.5299	-4.64578	-3.63846	-4.68082	-3.47835	-3.17765	-3.47861	-3.42616	-3.4924	-2.63296	-1.64803	-2.62679	-2.56231	-2.62205
sub35_l2	bi	1.71126	2.85148	2.9767	2.55838	4.25292	1.11152	1.42235	1.75148	1.39105	2.37578	2.17045	3.68459	3.0865	2.82309	4.41625	-1.59893	0.267881	-0.436971	-0.380701	1.28699
sub36_l2	bi	-2.79202	-0.804926	-0.60313	-0.52815	1.79123	-4.84201	-3.45412	-3.25919	-2.82263	-1.58899	-5.00193	-4.17487	-3.37716	-3.03521	-1.2334	-8.95287	-6.44665	-7.28139	-6.85157	-4.49301
sub37_l2	bi	2.35891	4.21342	4.06297	4.41516	5.32674	-1.16066	1.04895	0.664771	0.573778	1.18922	-1.62832	-0.243663	-0.230875	-0.20596	1.01435	-2.02364	-0.115702	-0.374287	-0.286342	-0.280216
sub38_l2	bi	-0.848539	0.004335	0.105517	1.15484	1.42789	-2.82787	-2.13079	-1.9219	-0.938348	-1.61353	-0.966922	-1.05635	-0.36428	-0.485542	0.150355	-3.57378	-2.90552	-2.82237	-2.32861	-2.00118
sub39_l2	bi	5.22351	8.34198	8.20468	8.4891	9.11954	2.41845	5.34322	5.40672	6.448	7.33761	4.1013	8.41246	7.04682	7.26466	8.50978	3.83929	6.28931	6.37351	7.60198	8.57182
sub40_l2	bi	-3.8018	-1.01394	-2.96834	-0.820943	0.116249	-2.23323	-0.921484	-1.82686	0.003007	-0.033964	-1.23459	0.068239	-0.36348	1.43496	0.906595	-2.76187	-0.26195	-1.73678	-0.404888	-1.27245
sub91_l2	bi	0.712711	3.16925	0.726299	2.30274	1.59663	-1.9529	0.647592	-1.93881	0.975574	1.28731	-3.99547	-1.81164	-3.96733	-1.43251	-1.12634	-3.09993	0.043811	-3.0695	-1.17525	-0.937363
sub92_l2	bi	-0.290698	1.14984	-0.205949	1.0039	4.16874	-2.99396	-0.653091	-2.92599	-1.46454	1.21116	0.739405	1.28869	0.786314	2.51015	4.186	-1.85902	0.100712	-1.78558	-0.273408	3.90814

## Sheet: LPC
ID	Group	bin9_F3	bin9_FZ	bin9_F4	bin9_FC1	bin9_FC2	bin9_CZ	bin9_CP1	bin9_CPZ	bin9_CP2	bin9_PZ	bin10_F3	bin10_FZ	bin10_F4	bin10_FC1	bin10_FC2	bin10_CZ	bin10_CP1	bin10_CPZ	bin10_CP2	bin10_PZ	bin11_F3	bin11_FZ	bin11_F4	bin11_FC1	bin11_FC2	bin11_CZ	bin11_CP1	bin11_CPZ	bin11_CP2	bin11_PZ	bin12_F3	bin12_FZ	bin12_F4	bin12_FC1	bin12_FC2	bin12_CZ	bin12_CP1	bin12_CPZ	bin12_CP2	bin12_PZ
sub01	mono	-4.55088	-3.65709	-2.68025	-3.38438	-2.8592	-2.95542	-2.56622	-1.89639	-2.49925	0.007048	-2.81451	-1.4595	-2.17316	-3.6185	-1.49084	-1.59828	0.007982	-0.152834	1.44537	1.27072	-5.24055	-2.27464	-3.23453	-4.62246	-2.56252	-3.40248	-4.39563	-3.40864	-3.61891	-2.08574	-1.88448	0.350055	0.24274	-1.49859	1.58323	0.447688	0.534374	1.16831	3.34359	1.71316
sub02	mono	0.679957	1.60922	1.0616	1.19049	1.78849	3.60106	1.37427	1.88369	2.46934	2.35372	-1.83294	-1.03011	-0.805893	-1.99224	-0.841595	-1.70945	-0.825076	0.507126	-2.04548	0.239702	1.54943	2.6051	2.84801	0.039022	2.69541	2.21407	3.25711	2.88414	2.36662	2.62351	1.90503	4.2293	2.63725	2.11764	3.67058	2.16343	1.93507	1.55258	1.80304	1.44521
sub03	mono	3.17651	6.49697	6.66528	5.77976	7.07221	6.84092	6.31056	7.05721	5.85643	5.47093	2.60642	4.7152	5.39906	3.25594	4.05808	4.5618	2.8381	4.96171	4.90788	4.356	7.71122	10.4967	10.1828	8.68298	9.45663	9.57097	6.61278	8.79926	8.48007	6.4095	1.59892	3.09024	3.40655	2.06806	2.7452	3.63243	2.99866	4.00986	4.10569	3.1354
sub04	mono	3.82967	4.4708	5.08083	4.29059	5.62733	4.65495	4.91399	4.96812	5.69122	5.63441	2.8273	3.39689	2.82884	4.15014	5.69234	4.47842	3.69048	3.50389	5.46647	4.57358	6.44343	6.9006	5.64383	7.56051	9.17877	7.06384	7.19076	6.88861	7.70533	7.91863	2.26208	2.55216	1.5905	3.1245	2.9929	2.27047	3.88502	3.1659	4.10251	4.31975
sub05	mono	0.036613	1.1045	0.194665	3.37601	3.50989	4.41789	0.012461	2.56212	0.34763	0.981753	-2.92099	-0.720347	0.687153	-0.516104	0.78209	0.297853	0.93337	0.885321	-1.59456	1.28694	4.63855	5.11336	5.24667	5.09802	2.15514	3.40363	7.24224	6.74042	4.49167	5.0081	-3.14605	0.797428	-1.21112	2.84713	3.30925	4.50856	1.50115	3.15408	1.72869	2.61234
sub06	mono	0.213364	0.602622	0.27923	2.05687	4.09127	5.20964	3.9927	5.17455	4.13284	5.00943	0.87495	0.674427	-0.066902	2.38338	2.87038	5.26797	3.03408	5.26374	3.87354	4.62436	0.010691	2.15822	1.49195	1.98055	3.23325	4.88686	3.55586	4.89488	3.62269	2.99889	-2.92786	-1.72284	-1.88807	-0.984011	1.13728	2.9592	2.37597	2.97013	3.51977	3.87635
sub07	mono	-2.77393	-2.91627	-2.66776	-2.4148	-1.43798	0.173553	1.4529	2.23605	1.99314	3.75494	0.32095	2.4991	0.241758	1.31116	1.77097	3.80865	3.23782	5.21554	4.50331	5.07475	0.711818	0.107789	0.782142	1.20154	2.00855	4.64024	4.46253	6.7748	6.66539	7.06855	-2.85223	-3.47601	-2.62337	-1.70523	-1.85905	-0.149457	0.281616	3.528	2.45707	2.86299
sub08	mono	-1.24217	-0.33091	-0.946128	-0.78895	0.385336	1.89992	2.21796	1.91825	1.89354	1.91217	-1.70495	-1.38579	-2.61233	-1.24528	-1.35872	-0.109652	-0.622368	-0.091457	0.110608	1.26013	-1.73993	-0.590309	-1.30105	-1.70862	-1.02127	1.11779	0.788982	1.1194	0.676041	3.4571	-1.50215	0.647094	-1.27469	1.81961	1.45673	1.89357	1.37622	1.94638	0.077339	1.97574
sub09	mono	6.29167	6.64222	6.3357	6.24856	7.00918	7.51675	7.41449	7.60856	8.31006	7.66088	6.09773	5.70505	6.06281	6.39092	7.04133	9.12581	9.62064	9.3487	9.48623	9.06194	6.43317	7.58159	8.81202	7.19007	9.19688	9.10132	9.28203	9.29641	10.4369	9.98749	4.93652	6.31334	6.59263	6.84351	7.54787	9.37444	8.9274	9.63334	10.066	9.16116
sub10	mono	-2.81663	-2.88423	-4.25837	-1.49731	-2.04503	0.191672	1.73145	0.244595	0.29548	3.78591	-3.57323	-3.9818	-4.49165	-0.912705	-0.610186	2.35647	4.16046	2.41223	0.949091	5.8848	-1.19584	-2.61824	-2.95071	-0.646782	-0.652452	1.80046	3.43257	1.82066	1.4504	4.6331	-4.39543	-3.21477	-4.18281	-1.14582	-0.214547	1.6518	2.58157	1.70857	0.485755	4.56582
sub11	mono	-0.086655	0.729419	0.626965	0.550886	0.614491	2.11845	2.19849	2.13236	2.29971	4.22992	-1.13056	0.147131	-0.429987	-1.0954	-0.227634	-0.125024	0.566241	-0.018662	0.351654	2.27374	2.00666	2.62576	1.66678	2.00065	1.9409	1.75974	1.32905	1.74453	0.279521	2.44136	0.397619	2.37554	1.63697	1.77749	1.65856	2.81902	2.88118	2.88458	4.06348	5.51102
sub12	mono	-0.185201	-0.510096	-0.04432	-0.085055	1.19334	2.24231	3.3114	3.04943	1.89797	3.17803	-3.27323	-4.25217	-2.61754	-3.06113	-2.75006	-1.66508	0.110454	-0.389406	-0.105738	1.06731	0.58782	0.674193	0.87545	1.26414	1.20388	1.63083	2.18182	2.55822	1.80349	2.1276	-1.57129	-1.85733	-2.03401	-2.22905	-2.61362	-2.06429	-1.38215	-1.16048	-1.59955	-0.473943
sub13	mono	3.18977	3.39595	3.79069	2.36438	3.47468	3.75714	4.21816	4.75297	4.27599	4.21014	4.26512	5.52885	5.52013	5.36355	5.09401	5.89488	6.41608	7.08539	6.45695	6.90139	2.94474	3.85085	4.28653	3.42618	3.78626	3.80946	4.20549	4.58525	3.75456	3.63482	2.11016	2.74994	2.96174	3.28457	2.98917	4.24204	5.57381	6.3849	5.59878	6.47786
sub14	mono	2.40819	4.21435	3.44281	3.56892	6.01414	5.36297	5.26942	5.38458	3.06538	3.78471	0.238921	2.5784	1.87777	2.6714	1.11151	2.72048	1.8562	2.70367	4.61585	-0.019338	4.40236	1.68684	3.56234	1.99211	3.96868	2.41613	1.35374	2.41904	0.386436	0.115134	2.1862	0.152717	0.638191	0.731593	1.6094	2.51255	3.13323	2.53634	3.38568	2.21568
sub15	mono	-0.945743	-1.20845	-1.54029	-0.297048	-0.765632	1.70399	3.25956	1.70015	0.782161	2.83817	-2.77895	-3.63903	-3.71807	-2.75346	-3.71928	-1.8756	-0.588193	-1.85642	-2.13132	-0.877361	0.037189	-0.271011	-1.51816	0.998202	-0.598163	1.09411	2.23252	1.08165	0.035226	0.540996	-2.33214	-2.419	-2.89128	-0.878419	-2.72654	0.018557	2.28489	0.009822	-0.237306	0.915718
sub16	mono	2.15316	2.16163	0.513104	2.01004	0.105222	1.61309	3.6562	2.43437	1.24266	2.63605	-1.21553	0.887132	-2.86588	0.749277	-0.798583	1.43467	2.58883	0.509892	-1.41097	-0.767632	2.96713	3.84908	1.928	4.34353	3.77316	4.58881	6.22792	4.31356	5.40048	5.2588	0.343965	3.7851	1.67623	1.86627	1.61082	4.28828	3.48116	2.25231	3.33727	2.80726
sub17	mono	-0.722012	-3.16011	-0.623064	0.332912	-1.44798	0.793375	5.51986	3.39719	2.36172	4.03256	-0.686956	-2.28658	-2.07822	0.601437	-0.71276	1.62169	5.88606	4.59931	4.64103	5.55022	0.400147	-0.248594	0.916057	1.89191	2.07929	3.4912	6.01332	5.61471	6.36306	6.48597	0.183123	-0.741114	0.399351	0.59944	0.132248	2.14411	4.24134	3.23681	3.61247	5.18937
sub18	mono	1.64118	2.8053	2.58559	3.59514	3.28975	6.19522	7.83211	7.51067	7.94781	7.53557	1.71943	3.08128	3.05498	2.29239	3.6212	4.51256	5.44932	5.50881	5.19015	5.94745	2.54112	4.05184	4.28628	3.87148	3.48982	5.7892	8.41776	7.39679	8.55344	7.7654	-0.516287	1.12862	1.81988	0.407495	1.571	3.29461	6.00088	3.21165	5.72594	6.81686
sub19	mono	-0.208345	0.295212	0.893047	-0.627419	1.68831	2.07078	2.76418	3.17807	1.69487	4.3363	-0.673711	-0.536779	-0.90855	-1.08266	-0.293481	-0.502902	0.618019	0.09621	1.06584	2.01156	3.09676	4.53762	4.08025	2.41687	3.52162	5.33259	6.43586	6.18994	4.38616	6.28881	-0.421719	-0.294883	0.29131	-0.473334	0.475777	-1.17769	1.04598	0.657405	0.951755	0.610583
sub20	mono	-0.489892	-0.4485	-0.149496	2.10455	0.039249	1.17399	2.52345	2.54338	2.92105	3.73715	2.44559	3.53389	1.47218	2.12322	2.77477	1.23949	1.85032	2.29517	2.57662	4.12203	1.45199	2.50894	2.40016	1.19121	2.98618	3.46883	3.99292	3.17338	3.78565	3.88547	3.62859	4.85556	3.29734	3.51512	4.10338	4.33645	5.06941	5.00445	4.97029	5.14644
sub21	mono	4.82284	5.25361	3.93289	4.99313	3.79083	3.94655	4.58875	3.96955	4.82302	4.22652	3.71873	3.41175	0.940275	3.78221	3.70307	2.46683	3.27352	2.5131	1.7026	1.7908	1.99815	-0.036897	-5.61204	2.46838	0.306959	-0.287815	-0.808422	-0.305921	-0.098408	-0.552368	-0.720307	-1.48367	-4.10362	-0.20683	-2.97183	-2.59794	-1.3194	-2.61314	-1.24223	-2.28
sub22	mono	2.30842	2.30759	9.19523	3.69429	3.88415	4.68987	5.26987	4.68811	5.92029	7.0804	-0.129782	-2.12945	0.036254	-3.05769	2.01165	3.62271	2.93497	3.67245	5.95159	5.73207	3.26369	2.46476	1.25134	3.1945	4.86959	7.52715	5.81315	7.58756	7.85034	8.41884	1.46126	1.13651	1.74347	1.56014	4.47699	6.04381	5.04929	6.07757	9.84331	9.87484
sub23	mono	0.090345	-1.45746	-2.68245	-1.68866	-2.16223	-2.12391	-1.24464	-1.49293	-0.613568	-1.10767	2.11612	4.944	2.14965	3.92901	3.75212	3.05193	3.74738	1.77234	3.00514	1.5461	-0.659938	0.461893	-0.322964	0.638023	0.16447	1.88169	-1.11553	2.34737	0.99088	1.02058	6.26671	4.79612	2.14867	4.0417	3.26566	3.76303	3.49621	3.25373	2.99945	3.72113
sub24	mono	-2.95415	-2.23579	-2.83905	-0.39776	-0.95685	1.85398	1.92568	1.86727	2.54344	3.11519	-1.6377	-1.17371	-2.12282	0.254969	-0.148562	0.118187	0.424553	0.129551	0.745562	0.66651	2.34362	4.55942	2.4994	3.74839	4.59319	4.82284	4.97041	4.79418	5.06663	4.87108	-3.54143	-3.8711	-3.13411	-3.24433	-3.25995	-0.857143	-0.066106	-0.803638	0.31982	0.488402
sub25	mono	-2.79022	-4.5054	-4.18789	-2.65942	-3.51512	-2.34141	-0.197636	0.088183	-0.733514	2.61461	-2.82339	-1.52035	-3.18854	-1.20222	0.267651	0.409034	0.947488	0.264304	0.535623	3.05246	-2.39143	-3.39564	-5.70806	-2.87737	-2.77611	-0.551939	0.371268	0.243865	-0.699215	2.69338	-6.38001	-7.27976	-6.61179	-4.67608	-4.24124	-2.44143	-0.720953	-1.45464	-1.66048	1.8658
sub26	mono	-0.161263	0.279713	0.220473	1.47172	1.06919	2.22217	3.24864	2.72666	1.57167	2.50079	-1.37852	-1.43977	-1.99535	-0.242857	0.006169	0.64524	0.514991	1.51469	0.645606	1.20837	-1.65575	-0.339595	-0.959954	0.457757	-0.721211	1.45431	2.01842	1.51148	1.0695	1.31941	-1.16524	-0.398725	-1.28345	0.001884	0.766868	1.07634	2.46805	1.58877	2.00612	3.21691
sub27	mono	-0.38973	1.77487	1.24479	0.26311	3.02133	3.01931	2.4566	3.46929	4.07492	5.54598	0.065779	3.45945	2.22682	1.83239	1.75471	1.09397	1.42929	1.38814	1.37059	1.45367	2.37449	5.51454	3.98937	3.84548	3.96578	5.64498	6.57972	6.80442	7.08757	8.04347	-0.995642	1.20596	-1.03065	-0.029126	-0.270502	1.48322	2.65028	2.74276	2.76076	4.65967
sub28	mono	-0.396813	-0.686405	-0.484595	0.102246	2.66417	1.44074	1.62615	1.28543	3.14635	2.19629	-0.120828	-1.59557	-0.118951	-0.794797	-0.84455	0.02062	4.73288	1.98462	0.988242	3.80681	-2.08819	-0.223028	-1.18027	0.728285	0.306696	1.9839	2.26384	2.55049	2.15215	1.99213	-3.92942	-3.44508	-3.14569	-3.648	-2.25378	-1.53122	-2.0584	0.568052	0.594672	0.717462
sub29	mono	-0.548593	-2.12702	-2.11178	0.09703	-2.02786	0.31737	1.89543	0.302972	-0.037958	0.918257	-3.21606	-2.28972	-4.67571	-2.14317	-4.29723	-2.68978	-0.500563	-2.70638	-3.46259	-2.21261	-2.79256	-1.75429	-3.10861	-0.080833	-2.381	1.34117	1.08535	1.33689	0.03329	0.850413	-5.15637	-3.6758	-5.43276	-3.5357	-4.28877	-0.432103	1.47043	-0.411298	0.004673	0.704084
sub30	mono	3.86924	2.28381	6.58486	3.91508	7.02662	7.32414	8.71385	7.31638	8.11704	1.13308	1.14911	1.18634	-0.048655	1.15075	0.153555	3.73056	4.58936	3.74963	5.39964	0.973559	-0.339008	-0.601495	-0.862337	-0.336276	3.09499	4.47188	3.13627	4.48896	4.8902	-0.125805	1.50118	-0.026253	-0.331352	1.46966	2.10776	3.22859	3.27779	3.24344	2.93496	0.454367
sub31	mono	3.70137	3.65925	3.50908	2.97177	4.93661	8.8468	10.7694	9.08827	8.67103	11.3227	-0.607007	-0.781023	1.44941	1.80249	4.19741	6.00834	6.15391	6.42902	8.79807	10.0314	2.50479	5.67317	2.59764	4.93261	6.57214	8.24031	9.40507	8.50797	8.76371	10.5775	4.33314	4.88436	3.70538	5.52478	6.04702	9.15787	9.78072	9.50038	10.4855	11.9273
sub32	mono	0.857853	0.064643	0.773156	1.36594	3.03808	3.50936	5.3691	5.37819	4.21532	3.3903	2.18036	0.857507	0.855512	4.07029	3.89173	5.63693	5.28035	6.20872	5.51674	4.11794	4.0285	5.06482	5.42301	4.45463	7.11659	8.28334	9.99082	9.2504	8.25171	6.19322	1.54604	3.1001	2.32899	5.55485	4.52028	6.8674	6.34823	7.08579	6.97309	4.47142
sub03_l2	bi	-4.46698	-6.04256	-3.23076	-5.52477	-3.73655	-3.82567	-1.15539	-0.145574	0.1006	1.57211	-0.27033	0.738401	1.16919	-1.57573	0.78642	1.22428	-0.207762	1.8765	3.16095	1.8109	-4.28045	-3.57377	-2.67127	-4.886	-2.67365	-4.50581	-1.8718	-1.73939	0.175719	-0.129322	-2.85441	-3.0584	-1.07026	-3.3771	0.053938	-3.12774	-1.96719	-0.857311	0.738369	-0.703738
sub04_l2	bi	-3.69223	-3.87077	-0.957284	-1.35315	-0.087438	4.23982	4.65015	4.39216	5.78217	3.97608	-2.85976	-1.1118	0.729478	-0.579218	2.28046	3.9442	2.29084	3.99328	4.55244	1.85175	-2.56764	-0.206284	1.6005	1.51854	4.39052	7.7169	7.05816	7.76389	8.6913	6.39147	-4.17899	-1.92339	-1.69338	-0.965548	0.830249	4.28449	3.72562	4.37295	5.32206	3.04144
sub06_l2	bi	1.01634	0.952975	1.00467	2.76792	2.22897	5.35185	5.66833	6.56022	7.09388	7.50323	-1.20167	-0.905426	-1.54108	0.4882	2.22428	3.34539	5.02832	4.99484	4.81312	4.19314	0.61189	-0.574899	1.17153	1.71989	1.93758	4.68998	5.58699	6.68351	5.83674	5.78378	-3.52833	-3.45675	-3.29974	-2.2952	-1.86038	1.88561	2.52263	3.48735	4.35369	3.87909
sub07_l2	bi	0.630194	2.67921	2.18782	1.1025	1.28709	0.682974	1.02758	1.35015	3.26541	2.06535	-0.874643	-0.598779	-0.676045	-2.56818	-1.48475	-2.28437	-1.68917	-1.77505	0.171846	-0.241145	1.52544	2.57888	2.02746	0.49221	0.963621	-0.374303	0.39318	-0.140721	0.593693	-0.261937	-0.104263	0.136119	1.68161	-1.74331	-0.755731	-1.25029	-0.370169	0.880106	0.415501	0.78743
sub08_l2	bi	0.155292	1.91262	1.49231	-0.622205	2.77773	2.20375	1.24729	2.23797	3.22946	3.77683	3.22713	5.99904	2.90107	3.84634	5.27435	6.02966	5.57922	6.02605	6.64006	7.88948	3.92071	7.18048	4.62015	3.85842	6.43434	6.27543	4.51005	6.30011	5.59602	6.66846	4.536	8.16789	4.37752	5.26656	7.12762	7.3256	6.14879	7.30816	7.50937	8.83023
sub11_l2	bi	2.22683	5.28906	4.94393	3.37053	6.44659	5.58453	4.70403	5.58449	8.13674	5.65271	-0.750676	2.07462	0.272825	0.714788	4.31795	5.44558	3.36517	5.4492	5.86315	5.46076	3.29659	6.81426	5.2841	3.77374	7.27831	6.72781	4.68025	6.70802	7.3331	6.06623	-0.863217	2.42474	0.872044	0.803514	4.81675	7.01504	5.37012	7.07631	8.39744	7.76552
sub12_l2	bi	3.3034	3.77077	5.09384	5.11331	5.62019	6.2392	6.36696	7.49483	5.68263	7.68369	-0.741473	0.644232	-0.116114	0.106768	1.24928	2.09899	1.6172	2.34858	1.35105	1.36231	2.39797	3.67799	2.11695	2.24016	2.85615	4.64131	3.30838	4.91095	3.83249	4.30317	-0.744287	1.72405	0.945281	1.34246	2.23784	2.87087	2.4405	2.83426	1.98608	2.10597
sub13_l2	bi	1.55416	5.84347	5.98408	3.62535	6.28863	7.51095	5.5091	7.50496	8.38976	5.16606	2.21202	3.1442	4.09691	3.21141	4.2344	5.07963	3.52958	5.00635	6.37985	3.68133	3.49185	7.39181	6.59796	4.36092	8.12093	7.22012	6.33698	7.19712	7.5798	4.73366	7.46939	9.68989	8.0538	8.96345	9.16083	9.72693	8.75838	9.67051	8.6045	4.99171
sub15_l2	bi	-1.7146	-0.619732	-0.881477	1.30974	0.696278	4.05948	5.88801	4.98026	5.38076	8.09151	-1.46274	-0.510391	-0.591877	2.04814	-0.221042	4.10554	6.28237	4.78573	3.80822	5.43123	1.16078	2.98142	2.28773	4.55115	3.58162	6.25999	8.2935	7.36393	6.12521	7.16189	0.520254	1.45392	0.738837	2.41656	0.824291	2.92718	5.18116	3.97901	2.84949	4.84405
sub16_l2	bi	2.80028	4.13152	2.9239	5.84459	7.24825	8.83193	8.95012	10.5988	9.7554	10.0553	0.356636	2.86343	1.74627	3.52384	5.27437	7.1114	6.00772	7.97423	5.7344	8.5333	3.61891	5.67083	7.63646	7.14019	8.92511	11.0583	8.97166	11.3682	10.4232	11.4929	0.22685	1.84387	2.31938	3.11643	4.54202	6.28882	5.06795	7.51553	6.3657	8.71335
sub17_l2	bi	-0.519277	0.769815	1.3207	0.89813	3.94778	4.74471	5.05178	6.68311	6.2015	8.96147	-3.26057	-2.19788	-1.30281	-2.72617	0.409936	0.101913	-0.001975	1.22059	0.830848	3.27147	0.106472	1.4629	1.76751	1.36841	4.10592	4.08286	3.3379	5.57891	5.44772	6.87714	-2.62026	-2.53034	-1.50036	-1.94258	-0.394556	0.555128	1.68506	2.43418	2.11949	4.40854
sub19_l2	bi	-4.102	-4.55811	-3.98306	-3.90472	-3.70139	-2.49421	-1.16442	-2.51748	-1.01555	-0.029426	-5.7364	-6.73033	-5.81329	-6.19117	-5.88843	-4.62184	-2.99073	-4.58105	-2.7816	-0.253384	-2.55594	-1.24568	-0.937488	-0.273378	-0.681205	0.664286	0.929785	0.670687	0.921084	1.45196	-5.06125	-4.61959	-4.45884	-3.35027	-2.82864	-1.5282	-0.533374	-1.49608	0.246455	1.34815
sub24_l2	bi	-0.446242	2.53074	3.39106	1.8755	4.28898	4.35501	3.25464	5.01383	5.82135	3.52692	-0.2068	2.08661	1.74687	2.41693	3.51451	4.32968	4.7114	5.13272	6.21177	4.43011	0.994302	5.23445	4.28246	3.82495	6.08877	6.59348	6.35522	6.97752	6.04758	5.65275	0.964413	3.71738	3.28768	4.27352	5.45822	6.55347	5.7271	6.47747	7.14538	5.07106
sub25_l2	bi	-3.03462	-3.99697	-2.13085	-4.60458	-2.62265	-3.63442	-0.055819	-0.807415	-0.029364	1.00498	-1.8497	-1.89195	-1.38478	-2.00399	-1.51419	-0.646989	0.497666	0.684465	0.397429	1.63339	0.117954	1.00446	1.88431	-0.058517	1.85921	1.28538	2.21715	2.98703	4.37893	3.18361	-3.22115	-3.03235	-1.99478	-4.03289	-2.40405	-2.67535	-0.322152	0.130531	1.13735	0.821079
sub26_l2	bi	4.43614	5.58692	4.75641	4.22295	3.7391	5.78346	7.36111	7.34413	6.50715	5.1521	1.96201	1.14929	1.39988	1.5236	1.98728	2.55	3.08552	3.07438	2.30117	1.34604	7.10338	9.97183	7.89076	7.82485	10.0155	9.85936	9.91718	10.6631	8.75968	6.5683	5.16496	7.09836	4.98881	5.41626	6.43274	6.82865	7.63439	7.854	6.01843	5.51693
sub27_l2	bi	1.78022	3.13979	2.57876	3.42554	4.37394	5.00612	3.30543	3.79178	4.23867	1.7852	1.62844	1.54585	2.9034	2.11123	3.41173	3.80974	2.97016	3.0375	3.95671	2.50758	2.97908	7.31174	4.82442	5.76149	6.74425	5.82937	3.82905	4.29153	5.14842	2.61601	1.96414	5.50327	4.20468	5.9883	7.14338	8.53415	5.24571	7.31535	7.4271	5.29075
sub28_l2	bi	-2.29856	0.821163	-0.473816	0.145343	1.67995	3.50271	2.36798	4.54609	4.44422	6.52035	-0.333226	2.38332	1.92385	1.81695	2.57628	2.9867	1.6699	1.98146	1.5032	1.33507	0.886987	1.35682	1.64499	1.96492	2.47449	2.09476	5.37279	2.82207	3.43943	5.26039	-1.5026	2.10634	0.550817	-0.340914	0.994264	1.91602	1.10057	2.13853	2.16838	2.41263
sub29_l2	bi	0.903282	1.1114	1.13976	3.28727	3.12735	4.17422	4.57018	4.15583	3.29076	4.17033	-2.64027	-3.85117	-2.73593	-1.1325	-0.770553	1.35451	1.55645	1.35722	0.824618	1.31505	-2.42474	-3.46835	-3.11462	-1.23319	-2.09231	1.3981	1.56302	1.35971	-0.128503	1.37191	-1.57534	-3.09382	-2.68191	-0.927586	-1.73348	1.08158	1.29274	1.07251	-0.386276	1.07268
sub35_l2	bi	1.70837	2.75065	1.67345	2.15763	2.07856	2.9724	4.19985	4.1498	3.38671	5.2333	2.50428	4.10252	2.67385	4.0892	4.22753	5.37555	6.28488	6.99459	6.02595	8.38207	0.859267	2.37772	0.799506	2.73279	2.4759	4.03176	6.05437	5.31225	4.82209	6.80385	-1.44415	0.220787	-1.42151	-0.261756	-0.565342	1.16801	3.46037	2.82836	2.14681	5.35884
sub36_l2	bi	-1.62667	-0.065208	-1.54943	-1.30918	-1.33183	-0.387597	2.23928	2.36374	1.8107	4.54155	-2.88917	-0.90812	-0.871703	-2.49576	-2.10464	-2.33907	-0.842572	-0.477622	-1.05415	1.1502	-2.05179	-0.084021	-1.26285	-1.71607	-1.47112	-1.40166	-0.401279	0.319813	0.17076	2.31127	-2.54923	-1.8255	-2.67995	-3.86874	-4.17608	-4.86686	-2.69757	-3.28881	-3.32748	-1.18736
sub37_l2	bi	1.28916	1.15902	1.0531	3.01447	2.60156	4.35074	5.89695	6.04563	5.54276	6.75887	-2.97992	-3.74504	-2.98691	-2.7892	-2.58288	-1.26174	1.38221	1.62592	1.16482	2.62141	2.07734	2.58848	0.529908	3.36251	2.2813	3.9142	5.01337	5.32177	4.19248	5.86677	-1.60863	-1.85139	-1.98893	-0.63346	-0.808832	0.856454	2.62421	2.91926	2.09824	3.06516
sub38_l2	bi	-1.24749	0.216045	0.230754	0.916143	1.89755	3.0918	3.86385	4.17743	4.86009	5.51197	-0.896274	1.15306	0.862545	0.887173	2.04097	2.12811	2.04422	2.99419	3.57649	2.19992	0.162868	2.59247	1.54867	1.53207	2.69562	2.89576	1.81577	3.32055	2.37108	3.62433	-1.29886	1.11516	0.447107	0.317159	1.81433	1.40588	0.71293	1.78179	1.82661	2.06512
sub39_l2	bi	4.46816	3.92215	4.21497	5.38548	4.97938	6.89318	10.2751	9.89483	8.3775	9.86885	-0.466687	0.316459	1.51008	0.088851	1.70648	2.76059	4.4867	4.7931	4.82964	5.46198	4.81753	6.38411	6.05464	5.73862	5.42794	6.70926	9.44354	8.00749	7.26762	7.96467	1.39379	2.51916	6.58803	3.40762	5.63943	6.6742	8.78365	8.7437	8.7656	9.99237
sub40_l2	bi	-2.08337	-2.94436	-3.46775	-0.335982	-2.29302	0.870404	3.87197	2.35724	2.66312	5.1682	-1.02587	-1.05775	-1.94004	0.202501	-0.665911	2.30326	3.39299	2.46284	2.73872	2.53672	0.297637	-1.21931	-1.24282	1.74766	0.56599	2.19539	3.71846	3.23654	3.6576	3.53642	-0.50021	-0.478268	-1.41651	1.04661	0.085262	1.66171	3.88003	3.00883	2.86529	3.03664
sub91_l2	bi	0.064649	-0.434313	-0.017241	0.159848	-0.036998	0.886504	1.99063	0.897745	1.69746	1.38274	-1.27742	-0.738957	-1.32496	-0.515284	-0.373743	1.11869	1.9063	1.16767	2.22409	2.13895	-2.93044	-2.7498	-3.20944	-1.90299	-3.35719	-1.00307	0.279177	-0.96311	0.738	0.848183	-2.17754	-1.00142	-1.94656	-1.02572	-2.11465	-1.81548	0.217001	-1.78902	-0.570335	-0.06926
sub92_l2	bi	-2.67377	-1.06087	-2.97062	-0.435297	-0.371649	2.34969	3.21446	2.43899	3.19556	5.71147	-4.3223	-2.11418	-2.26085	-2.34684	-0.914027	1.21067	1.81137	1.28015	2.67304	4.74919	-3.46781	-2.58112	-3.88791	-1.46562	-1.24915	2.49049	2.60296	2.54822	3.74698	5.97204	-6.35099	-5.92947	-6.55048	-4.61831	-4.69759	-0.787352	0.57493	-0.690317	0.679205	5.04139
